# Supplementary material for: Revisiting the window of opportunity for cotranscriptional splicing in budding yeast
Source: PubMed Central journal article supplement (PMC7430680; doi:10.1261/rna.075895.120), 2020-09
Supplement: supp_075895.120_Supplemental_Tables.pdf [file supp_075895.120_Supplemental_Tables.pdf]

## Revisiting the window of opportunity for co-transcriptional splicing efficiency in budding yeast

Vahid Aslanzadeh<sup>1,2</sup> and Jean D. Beggs<sup>1\*</sup>

### Supplemental Information

#### Table S1

RNA-seq read counts for pre-mRNAs in the fast RNAPII mutant (columns A,B show counts for 2 biological replicates), slow mutant (C,D), wild-type (WT; E,F) or for spliced mRNAs (H-M). Pre-mRNA read counts calculated as sum of the reads aligning to 5'SS, intron, 3'SS and the reads spanning on exon1-intron-exon2 sequence. mRNA read counts calculated as sum of the reads aligning to exon1 – exon2 splice junction. Pre-mRNA ratios for fast, slow and WT (columns N,O,P respectively were calculated as counts of pre-mRNA divided by total read counts (pre-mRNA+mRNA)); log<sub>2</sub> ratio of mutant/WT for fast (S) and slow (T) RNAPII mutants. The second sheet (named 'RP') shows the same data for RP transcripts only, indicating those with non-consensus 5'SS that splice more efficiently (green) or less efficiently (red) in the fast RNAPII mutant.

#### Table S2

Transcripts with non-consensus 5'SS whose splicing efficiency was measurable in RNA-seq data from (Aslanzadeh et al., 2018), indicating those with improved (green) or reduced (red) splicing efficiency in the fast mutant compared to WT. The list of genes with non-consensus 5'SS sequences was obtained using the search facility of the Ares Lab Yeast Intron Database: <http://intron.ucsc.edu/yeast4.3/>, and checked in the Saccharomyces Genome Database: <https://www.yeastgenome.org/>

**Table S1**

|           | premRNA_<br>fast_A | premRNA_<br>fast_B | premRNA_<br>slow_A | premRNA_<br>slow_B | premRNA_<br>wt_A | premRNA_<br>wt_B | mRNA_<br>fast_A | mRNA_<br>fast_B | mRNA_<br>slow_A | mRNA_<br>slow_B | mRNA_<br>wt_A | mRNA_<br>wt_B | premRNA<br>ratio_fast | premRNA<br>ratio_slow | premRNA<br>ratio_wt | premRNAratio_fast/wt<br>(log2) | premRNAratio_slow/<br>wt(log2) |
|-----------|--------------------|--------------------|--------------------|--------------------|------------------|------------------|-----------------|-----------------|-----------------|-----------------|---------------|---------------|-----------------------|-----------------------|---------------------|--------------------------------|--------------------------------|
| YLR445W   | 22                 | 63                 | 38                 | 61                 | 17               | 22               | 0               | 30              | 2               | 9               | 25            | 5             | 0.83871               | 0.910714              | 0.609788            | 0.459863                       | 0.57869                        |
| RPS21A    | 2681               | 2194               | 1338               | 2088               | 2601             | 2657             | 31967           | 32994           | 19657           | 27747           | 29812         | 27827         | 0.069865              | 0.066857              | 0.083703            | -0.26072                       | -0.3242                        |
| RPS21B    | 886                | 935                | 744                | 1058               | 1233             | 1217             | 28754           | 29480           | 20819           | 30790           | 31625         | 28061         | 0.030317              | 0.033862              | 0.039546            | -0.38342                       | -0.22387                       |
| YBL059W   | 340                | 526                | 291                | 445                | 298              | 371              | 646             | 442             | 390             | 631             | 243           | 272           | 0.444108              | 0.420441              | 0.563907            | -0.34455                       | -0.42356                       |
| RAD14     | 86                 | 150                | 135                | 110                | 47               | 55               | 246             | 289             | 300             | 294             | 187           | 225           | 0.300361              | 0.291311              | 0.198642            | 0.596529                       | 0.552392                       |
| COF1      | 922                | 1075               | 644                | 1268               | 958              | 1017             | 5859            | 5744            | 6647            | 9631            | 6876          | 6690          | 0.146808              | 0.102335              | 0.127123            | 0.207708                       | -0.31293                       |
| YBR090C   | 1265               | 1073               | 1472               | 1733               | 1638             | 1438             | 2033            | 1762            | 2070            | 2534            | 1831          | 1523          | 0.381025              | 0.410862              | 0.478914            | -0.32988                       | -0.22111                       |
| LSB3      | 197                | 172                | 142                | 238                | 292              | 213              | 1737            | 1439            | 2112            | 2254            | 1729          | 1546          | 0.104314              | 0.079252              | 0.132787            | -0.34819                       | -0.74459                       |
| RPS11B    | 2947               | 3426               | 1945               | 2912               | 3469             | 2996             | 23216           | 21589           | 19059           | 23283           | 29458         | 25085         | 0.124799              | 0.101884              | 0.106023            | 0.235231                       | -0.05745                       |
| RPS11A    | 2284               | 2349               | 1378               | 2189               | 2451             | 2033             | 44844           | 40867           | 41816           | 49592           | 60786         | 47667         | 0.051409              | 0.037088              | 0.039832            | 0.368095                       | -0.10297                       |
| YDR261W-  | 13                 | 10                 | 1                  | 87                 | 13               | 9                | 211             | 165             | 203             | 318             | 128           | 136           | 0.057589              | 0.109858              | 0.077134            | -0.42156                       | 0.51021                        |
| YIL156W-B | 347                | 214                | 429                | 621                | 322              | 376              | 599             | 860             | 777             | 1057            | 846           | 965           | 0.283031              | 0.362902              | 0.278036            | 0.025688                       | 0.384308                       |
| IWR1      | 725                | 1321               | 967                | 1737               | 1383             | 1288             | 311             | 372             | 351             | 381             | 124           | 244           | 0.740039              | 0.7769                | 0.879224            | -0.24863                       | -0.1785                        |
| CIN2      | 776                | 750                | 532                | 808                | 724              | 556              | 206             | 280             | 197             | 176             | 218           | 205           | 0.75919               | 0.775453              | 0.749598            | 0.018344                       | 0.048922                       |
| NCB2      | 163                | 106                | 112                | 243                | 255              | 209              | 404             | 484             | 530             | 597             | 310           | 431           | 0.233569              | 0.23187               | 0.388945            | -0.73571                       | -0.74625                       |
| HRB1      | 1049               | 1507               | 1359               | 2059               | 1902             | 1896             | 447             | 448             | 614             | 702             | 563           | 371           | 0.736024              | 0.717272              | 0.803975            | -0.1274                        | -0.16463                       |
| GPI15     | 111                | 149                | 167                | 228                | 189              | 191              | 325             | 569             | 495             | 801             | 595           | 460           | 0.231054              | 0.23692               | 0.267233            | -0.20987                       | -0.1737                        |
| MOB1      | 151                | 174                | 242                | 386                | 238              | 201              | 251             | 305             | 262             | 461             | 232           | 271           | 0.369439              | 0.467942              | 0.466115            | -0.33535                       | 0.005644                       |
| CPT1      | 51                 | 71                 | 42                 | 152                | 115              | 81               | 1334            | 1662            | 1295            | 1843            | 1484          | 1566          | 0.038896              | 0.053802              | 0.06055             | -0.6385                        | -0.17047                       |
| RPS19B    | 2845               | 2911               | 1683               | 2603               | 2719             | 2406             | 25124           | 25245           | 22186           | 28165           | 27950         | 25344         | 0.102554              | 0.077555              | 0.08768             | 0.226072                       | -0.17701                       |
| RPS19A    | 2397               | 2393               | 1629               | 2372               | 2452             | 2225             | 16794           | 16373           | 13905           | 17881           | 15652         | 15929         | 0.12621               | 0.110993              | 0.129001            | -0.03156                       | -0.21692                       |
| BOS1      | 246                | 293                | 220                | 185                | 211              | 268              | 225             | 223             | 272             | 389             | 224           | 255           | 0.545061              | 0.384727              | 0.498743            | 0.128122                       | -0.37446                       |
| YLR464W   | 405                | 506                | 369                | 533                | 472              | 428              | 0               | 0               | 0               | 0               | 0             | 0             | 1                     | 1                     | 1                   | 0                              | 0                              |
| ACT1      | 797                | 591                | 623                | 1124               | 762              | 888              | 9313            | 9012            | 9679            | 14803           | 12787         | 11723         | 0.070188              | 0.065523              | 0.063328            | 0.148393                       | 0.049165                       |
| RPS6B     | 4319               | 4714               | 2009               | 3067               | 3773             | 3055             | 13989           | 16458           | 11840           | 18193           | 17903         | 16307         | 0.22928               | 0.144663              | 0.165923            | 0.466594                       | -0.19782                       |
| RPS6A     | 1627               | 1788               | 1264               | 2138               | 1999             | 1861             | 6254            | 6308            | 6391            | 9254            | 8148          | 8710          | 0.213648              | 0.176398              | 0.186526            | 0.195859                       | -0.08054                       |
| RPO26     | 388                | 518                | 656                | 800                | 774              | 761              | 1785            | 1731            | 2349            | 2777            | 2945          | 2348          | 0.20444               | 0.220977              | 0.226447            | -0.1475                        | -0.03528                       |
| MEI4      | 44                 | 119                | 54                 | 99                 | 91               | 193              | 0               | 0               | 10              | 0               | 0             | 0             | 1                     | 0.921875              | 1                   | 0                              | -0.11736                       |
| DMC1      | 547                | 662                | 268                | 597                | 375              | 374              | 4               | 32              | 0               | 42              | 47            | 8             | 0.973315              | 0.967136              | 0.933842            | 0.05973                        | 0.050541                       |
| APE2      | 3865               | 3726               | 3326               | 5183               | 3850             | 3673             | 535             | 639             | 440             | 541             | 419           | 381           | 0.866009              | 0.894325              | 0.903935            | -0.06184                       | -0.01542                       |
| SPT14     | 448                | 529                | 308                | 381                | 522              | 290              | 55              | 71              | 31              | 34              | 58            | 52            | 0.886161              | 0.913313              | 0.873977            | 0.019975                       | 0.063515                       |
| RPS22B    | 4582               | 4571               | 2017               | 3779               | 5328             | 5360             | 14320           | 13836           | 8298            | 9625            | 11326         | 9231          | 0.245369              | 0.238736              | 0.343636            | -0.48593                       | -0.52547                       |
| RPL42B    | 2253               | 2601               | 1548               | 2454               | 2372             | 2549             | 14555           | 13001           | 8923            | 11540           | 16536         | 15128         | 0.150376              | 0.161599              | 0.134824            | 0.157499                       | 0.261339                       |
| TDA5      | 122                | 171                | 135                | 199                | 367              | 305              | 404             | 354             | 447             | 521             | 297           | 260           | 0.278827              | 0.254174              | 0.546267            | -0.97024                       | -1.10379                       |
| KIN28     | 425                | 330                | 508                | 670                | 460              | 374              | 297             | 232             | 228             | 247             | 169           | 189           | 0.587916              | 0.71043               | 0.697809            | -0.24722                       | 0.025861                       |
| BET1      | 113                | 235                | 173                | 398                | 250              | 246              | 448             | 563             | 532             | 1001            | 676           | 518           | 0.247956              | 0.264939              | 0.295984            | -0.25543                       | -0.15986                       |
| ARP9      | 82                 | 92                 | 139                | 333                | 137              | 107              | 557             | 528             | 719             | 736             | 461           | 487           | 0.138356              | 0.236755              | 0.204616            | -0.56453                       | 0.210479                       |
| RPS10A    | 2958               | 3108               | 2017               | 3432               | 3742             | 3886             | 39842           | 37670           | 35960           | 43875           | 45573         | 40250         | 0.072665              | 0.062829              | 0.081963            | -0.17371                       | -0.38353                       |
| RPS10B    | 2235               | 2413               | 1848               | 2647               | 2051             | 2076             | 30938           | 27425           | 24684           | 28147           | 24466         | 21717         | 0.074122              | 0.077805              | 0.0823              | -0.15098                       | -0.08102                       |
| TMA20     | 286                | 360                | 160                | 412                | 313              | 254              | 830             | 1032            | 1250            | 1677            | 1066          | 1376          | 0.257447              | 0.155349              | 0.191402            | 0.427666                       | -0.30109                       |
| YDR535C   | 643                | 465                | 354                | 315                | 175              | 289              | 0               | 0               | 0               | 0               | 0             | 0             | 1                     | 1                     | 1                   | 0                              | 0                              |

|                   | premRNA_<br>fast_A | premRNA_<br>fast_B | premRNA_<br>slow_A | premRNA_<br>slow_B | premRNA_<br>wt_A | premRNA_<br>wt_B | mRNA_<br>fast_A | mRNA_<br>fast_B | mRNA_<br>slow_A | mRNA_<br>slow_B | mRNA_<br>wt_A | mRNA_<br>wt_B | premRNA<br>ratio_fast | premRNA<br>ratio_slow | premRNA<br>ratio_wt | premRNA<br>tio_fast/wt<br>(log2) | premRNA<br>ratio_slow/<br>wt(log2) |
|-------------------|--------------------|--------------------|--------------------|--------------------|------------------|------------------|-----------------|-----------------|-----------------|-----------------|---------------|---------------|-----------------------|-----------------------|---------------------|----------------------------------|------------------------------------|
| RPL42A            | 11151              | 11837              | 12080              | 16110              | 16205            | 16179            | 5470            | 4413            | 4676            | 5711            | 6610          | 5455          | 0.699665              | 0.729608              | 0.729064            | -0.05938                         | 0.001075                           |
| ARP2              | 226                | 208                | 208                | 318                | 243              | 205              | 1577            | 1737            | 2277            | 3003            | 2128          | 1711          | 0.116144              | 0.089728              | 0.104741            | 0.149084                         | -0.22319                           |
| UBC8              | 118                | 126                | 168                | 173                | 104              | 82               | 153             | 184             | 164             | 361             | 111           | 158           | 0.420938              | 0.414997              | 0.412694            | 0.028536                         | 0.008029                           |
| UBC9              | 200                | 203                | 190                | 270                | 217              | 275              | 1324            | 1333            | 1019            | 1496            | 1456          | 1286          | 0.131698              | 0.155021              | 0.152938            | -0.21572                         | 0.019518                           |
| HPC2              | 29                 | 111                | 47                 | 136                | 94               | 95               | 183             | 147             | 187             | 222             | 103           | 150           | 0.283513              | 0.290371              | 0.432456            | -0.60914                         | -0.57465                           |
| MAF1              | 115                | 129                | 87                 | 146                | 114              | 163              | 502             | 558             | 276             | 543             | 386           | 366           | 0.187079              | 0.225785              | 0.268064            | -0.51893                         | -0.24763                           |
| YRA1              | 6291               | 6815               | 4152               | 6033               | 3628             | 3337             | 3977            | 3961            | 2845            | 3630            | 2571          | 2972          | 0.622552              | 0.608869              | 0.557091            | 0.160281                         | 0.128217                           |
| ASC1              | 4257               | 4757               | 2087               | 3579               | 3332             | 3246             | 34037           | 38177           | 21126           | 34035           | 33712         | 36569         | 0.110982              | 0.092529              | 0.085737            | 0.372336                         | 0.109981                           |
| RPS18A            | 2935               | 2986               | 2103               | 3215               | 3425             | 3251             | 29420           | 29306           | 23611           | 33687           | 30949         | 33262         | 0.091591              | 0.084453              | 0.094338            | -0.04264                         | -0.15968                           |
| RPS18B            | 1113               | 1204               | 971                | 1151               | 1045             | 1252             | 23529           | 24150           | 21514           | 31723           | 30896         | 32434         | 0.046327              | 0.039098              | 0.034942            | 0.40691                          | 0.162161                           |
| PBA1              | 96                 | 153                | 99                 | 193                | 147              | 150              | 187             | 286             | 288             | 351             | 211           | 232           | 0.343871              | 0.305297              | 0.401642            | -0.22404                         | -0.3957                            |
| YLR211C           | 12                 | 11                 | 34                 | 84                 | 37               | 27               | 34              | 86              | 102             | 129             | 47            | 38            | 0.187136              | 0.322183              | 0.42793             | -1.19329                         | -0.4095                            |
| MRPL44            | 233                | 270                | 418                | 595                | 421              | 334              | 1146            | 1178            | 2220            | 2613            | 760           | 1017          | 0.177714              | 0.171964              | 0.301851            | -0.76428                         | -0.81173                           |
| RPL14A            | 4015               | 4266               | 3099               | 3925               | 4950             | 4539             | 70593           | 66837           | 46404           | 65645           | 70143         | 65670         | 0.056906              | 0.05951               | 0.065284            | -0.19815                         | -0.1336                            |
| RPL31A            | 2001               | 2007               | 1469               | 2027               | 1901             | 1935             | 61377           | 58478           | 41713           | 51267           | 58439         | 50652         | 0.032377              | 0.036027              | 0.03415             | -0.07693                         | 0.077154                           |
| RPL31B            | 947                | 1042               | 993                | 1240               | 1704             | 1264             | 9305            | 9366            | 11632           | 15559           | 13204         | 13276         | 0.096244              | 0.076234              | 0.100617            | -0.06411                         | -0.40037                           |
| RPL14B            | 2369               | 2245               | 1641               | 2333               | 2949             | 2462             | 24791           | 23821           | 14367           | 19682           | 18894         | 18656         | 0.086676              | 0.104242              | 0.125796            | -0.53739                         | -0.27115                           |
| ERD2              | 205                | 146                | 148                | 211                | 120              | 94               | 454             | 488             | 394             | 862             | 558           | 444           | 0.270681              | 0.234854              | 0.175856            | 0.622196                         | 0.417367                           |
| RPL37B            | 2912               | 3477               | 1721               | 2196               | 1860             | 1567             | 13952           | 11459           | 8860            | 10506           | 11712         | 9786          | 0.202734              | 0.167768              | 0.137536            | 0.559781                         | 0.286659                           |
| RPL16B            | 1573               | 1746               | 1120               | 1453               | 1863             | 1484             | 28001           | 27449           | 26926           | 33026           | 36431         | 35372         | 0.056497              | 0.041038              | 0.044457            | 0.345744                         | -0.11546                           |
| RPL16A            | 2026               | 2146               | 1419               | 2041               | 2529             | 2198             | 17526           | 16226           | 17937           | 22324           | 24017         | 22443         | 0.110215              | 0.078539              | 0.092235            | 0.256934                         | -0.2319                            |
| RPL37A            | 3353               | 3119               | 2428               | 3464               | 3589             | 3342             | 7605            | 7058            | 6854            | 7806            | 8238          | 7791          | 0.306231              | 0.284473              | 0.301823            | 0.020915                         | -0.08541                           |
| RPS17A            | 8545               | 7274               | 6069               | 7438               | 9703             | 8882             | 17861           | 17134           | 15351           | 20995           | 26661         | 21157         | 0.310809              | 0.272465              | 0.281256            | 0.144144                         | -0.04581                           |
| RFA2              | 134                | 192                | 133                | 208                | 170              | 124              | 320             | 333             | 233             | 390             | 374           | 298           | 0.330434              | 0.355607              | 0.303169            | 0.124239                         | 0.23016                            |
| COX5B             | 1061               | 1121               | 631                | 903                | 528              | 630              | 409             | 409             | 857             | 1384            | 451           | 352           | 0.727224              | 0.40945               | 0.590437            | 0.300617                         | -0.5281                            |
| RPS17B            | 2307               | 2659               | 1159               | 1809               | 2513             | 2020             | 4141            | 4492            | 4621            | 5765            | 5737          | 4407          | 0.364811              | 0.219681              | 0.309453            | 0.23743                          | -0.49431                           |
| RPS27B            | 1964               | 2719               | 1359               | 2193               | 2391             | 1937             | 16178           | 15957           | 15716           | 23960           | 24736         | 24605         | 0.126923              | 0.081721              | 0.08056             | 0.655815                         | 0.020653                           |
| RPL27B            | 2098               | 2648               | 1497               | 2016               | 2164             | 2386             | 8300            | 8720            | 7633            | 10549           | 10009         | 10097         | 0.217352              | 0.162205              | 0.184455            | 0.236763                         | -0.18545                           |
| RPL27A            | 3333               | 3037               | 2196               | 3149               | 2675             | 2548             | 32790           | 33478           | 24217           | 31250           | 34002         | 34096         | 0.08772               | 0.087342              | 0.071234            | 0.300336                         | 0.294113                           |
| RPS27A            | 3377               | 4145               | 2529               | 3496               | 4226             | 3003             | 1673            | 1383            | 1033            | 1231            | 1554          | 1447          | 0.709266              | 0.724788              | 0.702987            | 0.012829                         | 0.044061                           |
| NOG2              | 36807              | 34881              | 17084              | 40466              | 26939            | 32813            | 628             | 811             | 472             | 566             | 579           | 548           | 0.980251              | 0.97966               | 0.981266            | -0.00149                         | -0.00236                           |
| UBC5              | 135                | 102                | 93                 | 201                | 95               | 108              | 467             | 380             | 710             | 743             | 575           | 375           | 0.217935              | 0.16437               | 0.182697            | 0.254449                         | -0.15251                           |
| DTD1              | 76                 | 92                 | 74                 | 72                 | 98               | 74               | 1073            | 1619            | 1525            | 2532            | 1907          | 1695          | 0.059957              | 0.036964              | 0.045355            | 0.402679                         | -0.29512                           |
| EPT1              | 201                | 137                | 189                | 248                | 242              | 176              | 609             | 688             | 616             | 815             | 687           | 653           | 0.207104              | 0.234042              | 0.2364              | -0.19087                         | -0.01446                           |
| YJR079W           | 2493               | 2507               | 2366               | 2968               | 2032             | 1733             | 0               | 0               | 0               | 0               | 0             | 0             | 1                     | 1                     | 1                   | 0                                | 0                                  |
| YJR112W- <i>A</i> | 1584               | 1259               | 1039               | 1962               | 978              | 978              | 0               | 0               | 0               | 0               | 0             | 0             | 1                     | 1                     | 1                   | 0                                | 0                                  |
| NSP1              | 362                | 222                | 264                | 309                | 72               | 106              | 347             | 274             | 433             | 367             | 226           | 203           | 0.479079              | 0.417933              | 0.292326            | 0.712685                         | 0.515693                           |
| TEF4              | 4935               | 5006               | 1938               | 3104               | 2674             | 2739             | 47333           | 44246           | 25571           | 34239           | 36427         | 31970         | 0.098029              | 0.076786              | 0.07365             | 0.412519                         | 0.060146                           |
| TUB3              | 457                | 405                | 206                | 330                | 359              | 245              | 2988            | 2534            | 2242            | 2908            | 2098          | 1746          | 0.135229              | 0.093033              | 0.134583            | 0.006904                         | -0.53269                           |
| TUB1              | 53                 | 67                 | 77                 | 101                | 84               | 76               | 1707            | 1365            | 1382            | 2054            | 1463          | 1266          | 0.038451              | 0.049822              | 0.055465            | -0.52858                         | -0.15481                           |
| YDR210W-          | 27                 | 25                 | 33                 | 63                 | 13               | 8                | 414             | 398             | 352             | 435             | 58            | 152           | 0.060163              | 0.10611               | 0.116549            | -0.95399                         | -0.13538                           |

|           | premRNA_<br>fast_A | premRNA_<br>fast_B | premRNA_<br>slow_A | premRNA_<br>slow_B | premRNA_<br>wt_A | premRNA_<br>wt_B | mRNA_<br>fast_A | mRNA_<br>fast_B | mRNA_<br>slow_A | mRNA_<br>slow_B | mRNA_<br>wt_A | mRNA_<br>wt_B | premRNA<br>ratio_fast | premRNA<br>ratio_slow | premRNA<br>ratio_wt | premRNA<br>tio_fast/wt<br>(log2) | premRNA<br>ratio_slow/<br>wt(log2) |   |
|-----------|--------------------|--------------------|--------------------|--------------------|------------------|------------------|-----------------|-----------------|-----------------|-----------------|---------------|---------------|-----------------------|-----------------------|---------------------|----------------------------------|------------------------------------|---|
| YOP1      | 644                | 724                | 316                | 711                | 842              | 650              | 3453            | 3176            | 3583            | 5283            | 4577          | 4152          | 0.171415              | 0.099833              | 0.14537             | 0.237763                         | -0.54215                           |   |
| YLL067C   | 62                 | 46                 | 104                | 64                 | 84               | 93               | 0               | 0               | 0               | 0               | 0             | 0             | 0                     | 1                     | 1                   | 1                                | 0                                  | 0 |
| SRC1      | 113                | 189                | 124                | 207                | 108              | 138              | 391             | 723             | 688             | 767             | 435           | 588           | 0.215722              | 0.182618              | 0.194489            | 0.149483                         | -0.09086                           |   |
| NMD2      | 91                 | 107                | 101                | 116                | 35               | 75               | 236             | 430             | 325             | 454             | 87            | 87            | 0.238771              | 0.220299              | 0.374924            | -0.65097                         | -0.76714                           |   |
| AI2       | 43245              | 63639              | 232                | 352                | 51011            | 68457            | 260             | 359             | 1               | 2               | 408           | 506           | 0.994207              | 0.995029              | 0.992364            | 0.002677                         | 0.00387                            |   |
| YML6      | 97                 | 105                | 66                 | 71                 | 48               | 88               | 417             | 325             | 314             | 561             | 384           | 217           | 0.216451              | 0.143013              | 0.199818            | 0.115355                         | -0.48254                           |   |
| NBL1      | 260                | 165                | 250                | 278                | 455              | 356              | 4270            | 4217            | 3412            | 3951            | 3404          | 2919          | 0.047525              | 0.067003              | 0.113304            | -1.25346                         | -0.75791                           |   |
| YDR210C-C | 12                 | 31                 | 91                 | 197                | 69               | 45               | 259             | 359             | 900             | 1152            | 213           | 279           | 0.061884              | 0.11893               | 0.191785            | -1.63185                         | -0.68937                           |   |
| ECM33     | 1602               | 1580               | 1733               | 2277               | 1994             | 1986             | 4519            | 4135            | 4905            | 7384            | 6026          | 5518          | 0.269094              | 0.248381              | 0.256644            | 0.068342                         | -0.04721                           |   |
| YSF3      | 598                | 550                | 1112               | 1379               | 743              | 518              | 87              | 67              | 28              | 97              | 133           | 54            | 0.882201              | 0.95486               | 0.876884            | 0.008722                         | 0.122904                           |   |
| UBC12     | 357                | 431                | 652                | 867                | 430              | 371              | 120             | 148             | 157             | 211             | 117           | 109           | 0.746407              | 0.8051                | 0.779511            | -0.06261                         | 0.046598                           |   |
| UBC13     | 585                | 446                | 511                | 646                | 503              | 487              | 959             | 978             | 1425            | 1934            | 1137          | 1273          | 0.346044              | 0.257167              | 0.291706            | 0.246441                         | -0.18181                           |   |
| YLR202C   | 247                | 337                | 218                | 255                | 273              | 298              | 0               | 0               | 0               | 0               | 0             | 0             | 1                     | 1                     | 1                   | 0                                | 0                                  |   |
| YOR318C   | 1943               | 1865               | 1174               | 1146               | 1135             | 973              | 0               | 0               | 0               | 0               | 0             | 0             | 1                     | 1                     | 1                   | 0                                | 0                                  |   |
| MRK1      | 914                | 1078               | 291                | 549                | 597              | 508              | 7               | 36              | 5               | 31              | 117           | 28            | 0.980042              | 0.96483               | 0.891948            | 0.135884                         | 0.113315                           |   |
| RPL20B    | 2770               | 3180               | 1395               | 2299               | 2435             | 2448             | 5246            | 5543            | 3568            | 4954            | 5648          | 5055          | 0.355056              | 0.299026              | 0.31376             | 0.178388                         | -0.06939                           |   |
| SPO22     | 97                 | 110                | 107                | 133                | 76               | 154              | 3               | 0               | 0               | 0               | 0             | 0             | 0.985                 | 1                     | 1                   | -0.0218                          | 0                                  |   |
| RPL20A    | 2508               | 3058               | 1629               | 2222               | 2077             | 2650             | 6677            | 7391            | 5268            | 7502            | 8265          | 6804          | 0.282857              | 0.232348              | 0.240568            | 0.233626                         | -0.05016                           |   |
| RPS16B    | 2875               | 2873               | 1517               | 2319               | 2851             | 2554             | 24775           | 24828           | 18867           | 24463           | 29972         | 26523         | 0.103846              | 0.080505              | 0.087348            | 0.249609                         | -0.1177                            |   |
| RPL17A    | 2039               | 2081               | 1257               | 1780               | 2187             | 1937             | 38087           | 34432           | 25028           | 30360           | 32567         | 28388         | 0.053904              | 0.051602              | 0.063401            | -0.23412                         | -0.29708                           |   |
| RPL17B    | 874                | 852                | 885                | 1411               | 1581             | 1687             | 19269           | 19379           | 19905           | 23563           | 23309         | 20512         | 0.042752              | 0.049534              | 0.069757            | -0.70636                         | -0.49393                           |   |
| RPS16A    | 2909               | 3290               | 2137               | 3259               | 2995             | 3108             | 9436            | 10175           | 9242            | 13327           | 13092         | 12440         | 0.23999               | 0.192147              | 0.193036            | 0.314101                         | -0.00666                           |   |
| RPL26A    | 2567               | 2830               | 1823               | 2712               | 3471             | 2603             | 16077           | 15053           | 15999           | 21242           | 23946         | 20881         | 0.147968              | 0.107753              | 0.118721            | 0.317711                         | -0.13984                           |   |
| RPL26B    | 2837               | 3932               | 2543               | 3538               | 2349             | 2725             | 32691           | 32373           | 29412           | 38293           | 41235         | 40092         | 0.094079              | 0.08208               | 0.058769            | 0.6788                           | 0.481957                           |   |
| SEC14     | 662                | 529                | 582                | 781                | 577              | 731              | 1747            | 1327            | 1618            | 2032            | 1453          | 1565          | 0.279912              | 0.271092              | 0.301308            | -0.10627                         | -0.15245                           |   |
| RPS7A     | 3545               | 3785               | 2635               | 3514               | 3450             | 3321             | 77457           | 76820           | 48960           | 68065           | 74992         | 65096         | 0.045361              | 0.050082              | 0.046261            | -0.02835                         | 0.114486                           |   |
| SEC17     | 244                | 323                | 367                | 330                | 372              | 288              | 915             | 1256            | 1106            | 1591            | 823           | 805           | 0.207543              | 0.210468              | 0.287396            | -0.46963                         | -0.44944                           |   |
| GIM5      | 116                | 186                | 235                | 335                | 194              | 172              | 592             | 563             | 716             | 817             | 658           | 569           | 0.206086              | 0.268953              | 0.229909            | -0.15781                         | 0.226293                           |   |
| TAN1      | 134                | 193                | 323                | 332                | 300              | 234              | 267             | 339             | 969             | 1178            | 816           | 814           | 0.348473              | 0.234934              | 0.24605             | 0.502098                         | -0.0667                            |   |
| VPS75     | 358                | 403                | 204                | 430                | 396              | 427              | 1186            | 1551            | 905             | 1265            | 987           | 941           | 0.219054              | 0.218818              | 0.299234            | -0.44999                         | -0.45154                           |   |
| RPL6A     | 1869               | 1736               | 941                | 1284               | 1294             | 1219             | 10228           | 9716            | 8809            | 12512           | 13318         | 11724         | 0.153045              | 0.094792              | 0.09137             | 0.744169                         | 0.053043                           |   |
| RPS7B     | 2022               | 1952               | 1568               | 2366               | 3173             | 2610             | 27095           | 23675           | 21254           | 22776           | 30048         | 24798         | 0.072807              | 0.081406              | 0.09537             | -0.38946                         | -0.2284                            |   |
| YPR063C   | 129                | 136                | 60                 | 107                | 135              | 107              | 1347            | 1385            | 1243            | 1853            | 1349          | 1086          | 0.088407              | 0.05032               | 0.09033             | -0.03105                         | -0.84408                           |   |
| BET4      | 140                | 63                 | 104                | 188                | 193              | 173              | 86              | 149             | 59              | 90              | 54            | 102           | 0.458319              | 0.657148              | 0.705234            | -0.62175                         | -0.10188                           |   |
| HAC1      | 9598               | 9551               | 8447               | 12580              | 12406            | 10877            | 0               | 0               | 2               | 3               | 20            | 0             | 1                     | 0.999762              | 0.999195            | 0.001161                         | 0.000819                           |   |
| SRB2      | 257                | 298                | 283                | 353                | 362              | 303              | 1528            | 1171            | 978             | 1191            | 1336          | 883           | 0.173418              | 0.226526              | 0.234336            | -0.43432                         | -0.0489                            |   |
| YGR109W-  | 0                  | 7                  | 2                  | 5                  | 3                | 7                | 162             | 297             | 285             | 397             | 367           | 299           | 0.011513              | 0.009703              | 0.015492            | -0.42824                         | -0.67498                           |   |
| POP8      | 105                | 160                | 131                | 191                | 104              | 105              | 486             | 610             | 930             | 1257            | 840           | 923           | 0.192729              | 0.127687              | 0.106155            | 0.860401                         | 0.266445                           |   |
| HNT2      | 319                | 344                | 134                | 323                | 243              | 319              | 457             | 454             | 454             | 570             | 365           | 373           | 0.42108               | 0.294797              | 0.430327            | -0.03134                         | -0.54571                           |   |
| ERV1      | 608                | 812                | 633                | 910                | 947              | 716              | 1946            | 1714            | 1423            | 1931            | 1702          | 1477          | 0.279757              | 0.314095              | 0.341993            | -0.28979                         | -0.12277                           |   |
| HNT1      | 856                | 869                | 993                | 1201               | 1045             | 1102             | 12555           | 11518           | 7318            | 10407           | 9005          | 7432          | 0.066991              | 0.111472              | 0.116555            | -0.79897                         | -0.06434                           |   |

|           | premRNA_<br>fast_A | premRNA_<br>fast_B | premRNA_<br>slow_A | premRNA_<br>slow_B | premRNA_<br>wt_A | premRNA_<br>wt_B | mRNA_<br>fast_A | mRNA_<br>fast_B | mRNA_<br>slow_A | mRNA_<br>slow_B | mRNA_<br>wt_A | mRNA_<br>wt_B | premRNA<br>ratio_fast | premRNA<br>ratio_slow | premRNA<br>ratio_wt | premRNA<br>tio_fast/wt<br>(log2) | premRNA<br>ratio_slow/<br>wt(log2) |
|-----------|--------------------|--------------------|--------------------|--------------------|------------------|------------------|-----------------|-----------------|-----------------|-----------------|---------------|---------------|-----------------------|-----------------------|---------------------|----------------------------------|------------------------------------|
| YNL050C   | 105                | 192                | 187                | 216                | 108              | 163              | 78              | 123             | 182             | 189             | 139           | 132           | 0.591647              | 0.520054              | 0.494895            | 0.257616                         | 0.07154                            |
| YBL005W-E | 70                 | 38                 | 63                 | 214                | 43               | 62               | 1415            | 782             | 3141            | 4265            | 1241          | 939           | 0.04674               | 0.033721              | 0.047714            | -0.02975                         | -0.50076                           |
| RPS14A    | 5304               | 6061               | 1692               | 2339               | 2619             | 2663             | 31736           | 26432           | 22857           | 27777           | 29542         | 27726         | 0.164865              | 0.073295              | 0.084532            | 0.963708                         | -0.20579                           |
| YBR062C   | 248                | 280                | 365                | 530                | 236              | 320              | 409             | 598             | 390             | 658             | 309           | 322           | 0.34819               | 0.464786              | 0.465735            | -0.41963                         | -0.00294                           |
| YML133C   | 577                | 625                | 417                | 596                | 433              | 613              | 0               | 0               | 0               | 0               | 0             | 0             | 1                     | 1                     | 1                   | 0                                | 0                                  |
| YDR381C-A | 323                | 289                | 442                | 567                | 280              | 285              | 334             | 208             | 283             | 225             | 86            | 147           | 0.536559              | 0.662782              | 0.712375            | -0.4089                          | -0.1041                            |
| RPL18A    | 2560               | 2926               | 1466               | 2369               | 2847             | 2976             | 55533           | 55818           | 33450           | 49158           | 53738         | 48442         | 0.046938              | 0.043981              | 0.054096            | -0.20476                         | -0.29864                           |
| RPL35A    | 3773               | 3798               | 3452               | 4739               | 4943             | 4026             | 6139            | 5734            | 6292            | 7094            | 8010          | 6430          | 0.389549              | 0.37738               | 0.383326            | 0.02323                          | -0.02256                           |
| RPL35B    | 3061               | 3662               | 2386               | 3629               | 3131             | 2753             | 7343            | 7159            | 5349            | 6672            | 7275          | 7138          | 0.316315              | 0.330382              | 0.289609            | 0.127255                         | 0.190029                           |
| RPL18B    | 2398               | 2636               | 2222               | 3114               | 3300             | 3152             | 5431            | 5147            | 3943            | 5682            | 6333          | 6272          | 0.322492              | 0.357223              | 0.338519            | -0.06997                         | 0.07759                            |
| DBP2      | 823                | 911                | 454                | 820                | 748              | 773              | 2266            | 2390            | 879             | 1297            | 1721          | 1383          | 0.271203              | 0.363963              | 0.330745            | -0.28635                         | 0.13807                            |
| YPR202W   | 889                | 997                | 780                | 1287               | 1000             | 890              | 43              | 52              | 27              | 42              | 12            | 23            | 0.952146              | 0.96747               | 0.981475            | -0.04377                         | -0.02074                           |
| YHL009W-I | 0                  | 0                  | 0                  | 10                 | 0                | 0                | 126             | 110             | 121             | 191             | 51            | 43            | 0                     | 0.024876              | 0                   | inf                              | inf                                |
| TAF14     | 638                | 706                | 1019               | 1159               | 760              | 735              | 433             | 485             | 361             | 352             | 277           | 356           | 0.594242              | 0.752724              | 0.703289            | -0.24307                         | 0.098004                           |
| PFY1      | 1349               | 1259               | 1168               | 1834               | 1835             | 1527             | 6920            | 6062            | 6727            | 8500            | 8193          | 7303          | 0.167555              | 0.162707              | 0.17796             | -0.08692                         | -0.12928                           |
| SAR1      | 218                | 180                | 299                | 355                | 237              | 243              | 4008            | 3755            | 4494            | 5745            | 4240          | 3367          | 0.048664              | 0.06029               | 0.060125            | -0.3051                          | 0.003943                           |
| DCN1      | 61                 | 65                 | 146                | 113                | 71               | 89               | 24              | 11              | 27              | 53              | 54            | 31            | 0.786455              | 0.762327              | 0.654833            | 0.264237                         | 0.219282                           |
| PSP2      | 211                | 276                | 215                | 268                | 170              | 272              | 165             | 220             | 182             | 223             | 112           | 115           | 0.558811              | 0.543693              | 0.65284             | -0.22437                         | -0.26394                           |
| PRE3      | 573                | 480                | 444                | 661                | 1159             | 1084             | 4173            | 3881            | 3669            | 5165            | 3687          | 3027          | 0.1154                | 0.110704              | 0.251425            | -1.12348                         | -1.18342                           |
| MPT5      | 1251               | 1171               | 907                | 979                | 756              | 705              | 14              | 0               | 29              | 40              | 33            | 10            | 0.994466              | 0.964881              | 0.972094            | 0.032826                         | -0.01074                           |
| ECM9      | 55                 | 162                | 122                | 218                | 122              | 138              | 323             | 505             | 793             | 941             | 575           | 569           | 0.194191              | 0.160713              | 0.185113            | 0.069064                         | -0.20392                           |
| YLR227W-E | 69                 | 43                 | 280                | 276                | 84               | 101              | 74              | 63              | 205             | 331             | 101           | 94            | 0.444089              | 0.516007              | 0.486001            | -0.13011                         | 0.086431                           |
| YPR170W-I | 319                | 445                | 215                | 267                | 174              | 245              | 10897           | 10770           | 7646            | 10082           | 9824          | 8662          | 0.03406               | 0.026575              | 0.022455            | 0.601055                         | 0.24303                            |
| MCM21     | 109                | 115                | 163                | 178                | 102              | 106              | 253             | 357             | 350             | 443             | 326           | 252           | 0.272375              | 0.302187              | 0.267204            | 0.027652                         | 0.177501                           |
| YCL002C   | 525                | 500                | 563                | 782                | 981              | 788              | 216             | 353             | 114             | 161             | 209           | 120           | 0.647334              | 0.830439              | 0.846106            | -0.38633                         | -0.02696                           |
| TFC3      | 46                 | 117                | 50                 | 181                | 179              | 171              | 388             | 551             | 628             | 701             | 410           | 369           | 0.14057               | 0.139481              | 0.310286            | -1.14231                         | -1.15353                           |
| RPL13A    | 1464               | 1385               | 1182               | 1479               | 1750             | 1545             | 3803            | 4081            | 3445            | 4377            | 4717          | 3886          | 0.265671              | 0.254009              | 0.277541            | -0.06306                         | -0.12782                           |
| RPL13B    | 3017               | 3210               | 1613               | 2140               | 2257             | 2107             | 5910            | 6838            | 4582            | 7116            | 8128          | 6312          | 0.328715              | 0.245786              | 0.2338              | 0.491563                         | 0.07213                            |
| RUB1      | 568                | 537                | 583                | 853                | 678              | 657              | 3787            | 4262            | 4413            | 4678            | 2846          | 3312          | 0.121162              | 0.135458              | 0.178964            | -0.56274                         | -0.40183                           |
| YNL284C-B | 0                  | 1                  | 6                  | 21                 | 1                | 6                | 287             | 427             | 1639            | 1886            | 285           | 230           | 0.001168              | 0.00733               | 0.01446             | -3.62969                         | -0.98025                           |
| RPL40A    | 11578              | 11571              | 9516               | 12981              | 15202            | 11219            | 12834           | 13138           | 13110           | 17679           | 19349         | 15927         | 0.471283              | 0.421982              | 0.426635            | 0.143589                         | -0.01582                           |
| SCS22     | 273                | 139                | 322                | 459                | 341              | 212              | 214             | 407             | 480             | 515             | 220           | 218           | 0.407577              | 0.436374              | 0.550433            | -0.4335                          | -0.335                             |
| RPL22A    | 6370               | 7535               | 3731               | 6295               | 6333             | 6789             | 11845           | 12027           | 11417           | 13655           | 17459         | 16174         | 0.367449              | 0.280921              | 0.280916            | 0.387405                         | 2.71E-05                           |
| RPL22B    | 11564              | 13487              | 7976               | 12443              | 13820            | 12781            | 384             | 309             | 532             | 649             | 697           | 683           | 0.972731              | 0.943949              | 0.95063             | 0.033158                         | -0.01017                           |
| QCR9      | 390                | 452                | 226                | 381                | 606              | 493              | 741             | 894             | 693             | 1160            | 634           | 742           | 0.340319              | 0.246581              | 0.44395             | -0.38351                         | -0.84834                           |
| YHL050C   | 1013               | 880                | 919                | 1744               | 1120             | 1151             | 0               | 0               | 0               | 0               | 0             | 0             | 1                     | 1                     | 1                   | 0                                | 0                                  |
| RPL40B    | 1335               | 1314               | 810                | 1473               | 1725             | 1690             | 16250           | 16269           | 15322           | 19020           | 22130         | 19643         | 0.075324              | 0.061044              | 0.075766            | -0.00844                         | -0.31169                           |
| BUD25     | 1712               | 1614               | 1158               | 1535               | 1032             | 971              | 0               | 0               | 0               | 0               | 0             | 0             | 1                     | 1                     | 1                   | 0                                | 0                                  |
| RPL36A    | 3231               | 4022               | 2693               | 3789               | 3071             | 3282             | 8508            | 8131            | 9153            | 12329           | 10654         | 10768         | 0.303092              | 0.231206              | 0.228673            | 0.406467                         | 0.015894                           |
| RPS4A     | 1222               | 1514               | 825                | 1253               | 1516             | 1494             | 24674           | 22558           | 21900           | 26360           | 29382         | 23970         | 0.055042              | 0.04084               | 0.053868            | 0.0311                           | -0.39943                           |
| RPS14B    | 3614               | 3997               | 2598               | 3947               | 6078             | 5713             | 3418            | 2511            | 1744            | 1988            | 4471          | 3473          | 0.564052              | 0.63169               | 0.599047            | -0.08684                         | 0.076548                           |

|           | premRNA_<br>fast_A | premRNA_<br>fast_B | premRNA_<br>slow_A | premRNA_<br>slow_B | premRNA_<br>wt_A | premRNA_<br>wt_B | mRNA_<br>fast_A | mRNA_<br>fast_B | mRNA_<br>slow_A | mRNA_<br>slow_B | mRNA_<br>wt_A | mRNA_<br>wt_B | premRNA<br>ratio_fast | premRNA<br>ratio_slow | premRNA<br>ratio_wt | premRNA<br>tio_fast/wt<br>(log2) | premRNA<br>ratio_slow/<br>wt(log2) |
|-----------|--------------------|--------------------|--------------------|--------------------|------------------|------------------|-----------------|-----------------|-----------------|-----------------|---------------|---------------|-----------------------|-----------------------|---------------------|----------------------------------|------------------------------------|
| RPL36B    | 1373               | 1313               | 894                | 961                | 1365             | 1132             | 34145           | 31134           | 29370           | 36932           | 43261         | 35144         | 0.039561              | 0.02745               | 0.030896            | 0.356649                         | -0.17061                           |
| RPS30B    | 1416               | 1744               | 1087               | 2059               | 1452             | 1471             | 7751            | 7140            | 5288            | 8186            | 8001          | 7222          | 0.175388              | 0.185743              | 0.161409            | 0.119822                         | 0.202584                           |
| RPS30A    | 3479               | 4608               | 1919               | 3777               | 2680             | 2778             | 23433           | 22750           | 17665           | 21855           | 21698         | 15351         | 0.148853              | 0.122672              | 0.131585            | 0.177894                         | -0.1012                            |
| YFR045W   | 117                | 48                 | 105                | 164                | 67               | 47               | 83              | 97              | 120             | 146             | 69            | 56            | 0.458017              | 0.497849              | 0.474479            | -0.05094                         | 0.069366                           |
| BIG1      | 148                | 83                 | 115                | 126                | 140              | 95               | 552             | 736             | 569             | 768             | 391           | 537           | 0.156386              | 0.154534              | 0.206985            | -0.40442                         | -0.4216                            |
| RPL19B    | 7766               | 7450               | 7081               | 9380               | 9475             | 9517             | 6090            | 5295            | 5504            | 6763            | 6282          | 6120          | 0.572511              | 0.571855              | 0.60497             | -0.07956                         | -0.08121                           |
| SFT1      | 431                | 437                | 343                | 499                | 440              | 432              | 445             | 562             | 714             | 839             | 467           | 502           | 0.464723              | 0.348724              | 0.473821            | -0.02797                         | -0.44226                           |
| RPL19A    | 2941               | 3235               | 2065               | 2987               | 3608             | 3476             | 2903            | 2940            | 2668            | 3606            | 3721          | 2728          | 0.513569              | 0.444677              | 0.526287            | -0.03529                         | -0.24309                           |
| QCR10     | 37                 | 99                 | 85                 | 104                | 45               | 64               | 213             | 264             | 227             | 293             | 198           | 164           | 0.210364              | 0.2672                | 0.232943            | -0.14709                         | 0.197942                           |
| DID4      | 31                 | 162                | 151                | 158                | 115              | 125              | 490             | 468             | 598             | 676             | 433           | 403           | 0.158322              | 0.195525              | 0.223298            | -0.49611                         | -0.19162                           |
| RPL6B     | 1880               | 2029               | 1415               | 1676               | 2143             | 1619             | 18820           | 19719           | 15785           | 20311           | 26280         | 21313         | 0.092059              | 0.079247              | 0.072998            | 0.334688                         | 0.118495                           |
| YOL047C   | 183                | 174                | 344                | 454                | 179              | 164              | 0               | 7               | 0               | 6               | 39            | 3             | 0.980663              | 0.993478              | 0.901568            | 0.12132                          | 0.140051                           |
| YOL103W-I | 0                  | 14                 | 2                  | 2                  | 10               | 4                | 40              | 35              | 68              | 118             | 38            | 91            | 0.142857              | 0.022619              | 0.125219            | 0.190116                         | -2.46885                           |
| MOB2      | 47                 | 64                 | 80                 | 104                | 86               | 95               | 69              | 34              | 31              | 65              | 59            | 33            | 0.529117              | 0.668053              | 0.667645            | -0.3355                          | 0.00088                            |
| KEI1      | 148                | 167                | 165                | 240                | 171              | 148              | 548             | 461             | 597             | 637             | 562           | 396           | 0.239284              | 0.245098              | 0.252673            | -0.07855                         | -0.04392                           |
| CMC2      | 65                 | 84                 | 99                 | 142                | 97               | 138              | 482             | 622             | 1442            | 1659            | 552           | 643           | 0.118905              | 0.071545              | 0.163079            | -0.45576                         | -1.18865                           |
| CMC4      | 176                | 127                | 217                | 222                | 220              | 129              | 76              | 82              | 175             | 183             | 134           | 87            | 0.653034              | 0.55086               | 0.609346            | 0.099898                         | -0.14558                           |
| YIL082W-A | 2                  | 11                 | 8                  | 5                  | 4                | 13               | 559             | 532             | 275             | 659             | 418           | 346           | 0.011911              | 0.017899              | 0.022845            | -0.93954                         | -0.35198                           |
| IMD4      | 3148               | 3598               | 1521               | 2360               | 2349             | 2220             | 8303            | 9440            | 5532            | 8894            | 7927          | 7556          | 0.275437              | 0.212678              | 0.227839            | 0.273706                         | -0.09934                           |
| GOT1      | 193                | 187                | 167                | 249                | 186              | 161              | 1119            | 1077            | 997             | 1651            | 1333          | 1385          | 0.147523              | 0.137262              | 0.113294            | 0.380867                         | 0.276853                           |
| STO1      | 507                | 579                | 665                | 601                | 593              | 444              | 588             | 669             | 490             | 645             | 484           | 335           | 0.463478              | 0.529051              | 0.560283            | -0.27365                         | -0.08275                           |
| ERV41     | 162                | 182                | 150                | 222                | 213              | 214              | 1303            | 1122            | 1394            | 1424            | 1309          | 1082          | 0.125075              | 0.116011              | 0.152535            | -0.28635                         | -0.39488                           |
| YPR153W   | 163                | 172                | 452                | 462                | 310              | 297              | 388             | 500             | 401             | 316             | 430           | 281           | 0.275889              | 0.561862              | 0.46638             | -0.75742                         | 0.268711                           |
| YCL019W   | 2                  | 0                  | 0                  | 3                  | 0                | 0                | 28              | 113             | 167             | 413             | 60            | 63            | 0.033333              | 0.003606              | 0 inf               | inf                              |                                    |
| YLL066C   | 76                 | 65                 | 76                 | 56                 | 54               | 64               | 2               | 0               | 0               | 0               | 0             | 0             | 0.987179              | 1                     | 1                   | -0.01862                         | 0                                  |
| CNB1      | 239                | 152                | 232                | 394                | 126              | 127              | 1548            | 1626            | 1949            | 2571            | 1525          | 1511          | 0.109617              | 0.119628              | 0.076925            | 0.510932                         | 0.637027                           |
| OSW2      | 82                 | 81                 | 66                 | 77                 | 63               | 97               | 0               | 0               | 0               | 0               | 0             | 0             | 1                     | 1                     | 1                   | 0                                | 0                                  |
| SAC6      | 85                 | 150                | 148                | 153                | 83               | 108              | 2022            | 1702            | 1955            | 2719            | 2056          | 1723          | 0.060668              | 0.061824              | 0.048894            | 0.311279                         | 0.338527                           |
| SNC1      | 232                | 97                 | 142                | 286                | 198              | 280              | 3344            | 2785            | 2578            | 3437            | 3106          | 2649          | 0.049267              | 0.064513              | 0.077762            | -0.65843                         | -0.26947                           |
| EST3      | 43                 | 33                 | 18                 | 17                 | 70               | 35               | 1914            | 1763            | 1544            | 2137            | 2066          | 1891          | 0.020173              | 0.009708              | 0.025472            | -0.33646                         | -1.39167                           |
| GLC7      | 584                | 498                | 400                | 692                | 272              | 456              | 1721            | 1912            | 3037            | 4242            | 1838          | 2254          | 0.230001              | 0.128316              | 0.148588            | 0.630322                         | -0.21162                           |
| YDL012C   | 385                | 414                | 523                | 490                | 409              | 421              | 1846            | 1649            | 1777            | 2001            | 1438          | 968           | 0.186623              | 0.21205               | 0.262268            | -0.49091                         | -0.30664                           |
| GIM4      | 256                | 290                | 396                | 873                | 242              | 276              | 977             | 881             | 836             | 1525            | 1057          | 944           | 0.227638              | 0.342741              | 0.206263            | 0.142252                         | 0.732631                           |
| RPL21A    | 9477               | 9451               | 4750               | 6720               | 7641             | 7104             | 19766           | 19305           | 14565           | 19650           | 22326         | 21020         | 0.32637               | 0.250379              | 0.253788            | 0.362883                         | -0.01951                           |
| YBR219C   | 961                | 1028               | 729                | 1039               | 1165             | 882              | 0               | 0               | 0               | 0               | 0             | 0             | 1                     | 1                     | 1                   | 0                                | 0                                  |
| SMD2      | 27                 | 84                 | 59                 | 38                 | 73               | 71               | 52              | 83              | 161             | 116             | 83            | 47            | 0.422383              | 0.257468              | 0.534822            | -0.34051                         | -1.05467                           |
| RPL21B    | 6573               | 6264               | 3360               | 5560               | 6075             | 5277             | 14176           | 12659           | 9617            | 13305           | 14382         | 13667         | 0.323906              | 0.276823              | 0.287761            | 0.170704                         | -0.05591                           |
| RPS13     | 32757              | 33391              | 13861              | 20174              | 25585            | 21921            | 12713           | 12960           | 10449           | 14866           | 17348         | 14839         | 0.720402              | 0.572959              | 0.596128            | 0.273179                         | -0.05719                           |
| RPP1B     | 3459               | 3348               | 2721               | 4154               | 4685             | 5164             | 61825           | 60268           | 45962           | 65371           | 62118         | 59455         | 0.052806              | 0.05782               | 0.075023            | -0.50663                         | -0.37576                           |
| MUD1      | 31                 | 67                 | 45                 | 89                 | 65               | 60               | 46              | 72              | 81              | 96              | 36            | 52            | 0.442306              | 0.419112              | 0.589639            | -0.41479                         | -0.4925                            |
| RPS23B    | 2643               | 2903               | 1728               | 2786               | 2817             | 2721             | 47937           | 48544           | 34209           | 46954           | 46921         | 45832         | 0.05434               | 0.052048              | 0.056339            | -0.05212                         | -0.11431                           |

**RP genes**

|           | premRNA_<br>fast_A | premRNA_<br>fast_B | premRNA_<br>slow_A | premRNA_<br>slow_B | premRNA_<br>wt_A | premRNA_<br>wt_B | mRNA_<br>fast_A | mRNA_<br>fast_B | mRNA_<br>slow_A | mRNA_<br>slow_B | mRNA_<br>wt_A | mRNA_<br>wt_B | premRNA<br>ratio_fast | premRNA<br>ratio_slow | premRNA<br>ratio_wt | premRNA<br>tio_fast/wt<br>(log2) | premRNA<br>ratio_slow/<br>wt(log2) |
|-----------|--------------------|--------------------|--------------------|--------------------|------------------|------------------|-----------------|-----------------|-----------------|-----------------|---------------|---------------|-----------------------|-----------------------|---------------------|----------------------------------|------------------------------------|
| RPL23B    | 6219               | 6117               | 3896               | 5868               | 6985             | 6069             | 38703           | 35364           | 33114           | 42844           | 49086         | 40374         | 0.142953              | 0.112866              | 0.127625            | 0.163622                         | -0.1773                            |
| RPL23A    | 2696               | 2928               | 2252               | 2403               | 2900             | 2658             | 24928           | 26625           | 23757           | 33011           | 29283         | 28051         | 0.098336              | 0.07722               | 0.088332            | 0.154786                         | -0.19396                           |
| RPS23A    | 2079               | 2254               | 1471               | 2387               | 2630             | 2454             | 23914           | 21271           | 18446           | 26058           | 23788         | 21631         | 0.087898              | 0.078886              | 0.100721            | -0.19647                         | -0.35252                           |
| RPS9B     | 8394               | 9030               | 4237               | 5585               | 9919             | 8361             | 25405           | 24513           | 18985           | 22399           | 27688         | 24705         | 0.258779              | 0.191017              | 0.258306            | 0.002637                         | -0.43538                           |
| RPS9A     | 4568               | 4763               | 3262               | 4822               | 5716             | 6217             | 212             | 219             | 839             | 975             | 996           | 849           | 0.955845              | 0.813613              | 0.865728            | 0.142863                         | -0.08957                           |
| PMI40     | 137                | 98                 | 79                 | 143                | 117              | 128              | 2069            | 2112            | 1664            | 2429            | 2254          | 2086          | 0.053224              | 0.050461              | 0.05358             | -0.00963                         | -0.08652                           |
| RPS4B     | 1363               | 1384               | 561                | 1058               | 1308             | 996              | 13148           | 13605           | 8297            | 13005           | 12833         | 11929         | 0.093132              | 0.069283              | 0.084778            | 0.135572                         | -0.2912                            |
| OM14      | 67                 | 131                | 105                | 191                | 151              | 218              | 309             | 266             | 346             | 481             | 386           | 290           | 0.254083              | 0.258521              | 0.355163            | -0.48318                         | -0.4582                            |
| RRT8      | 57                 | 133                | 25                 | 84                 | 89               | 47               | 311             | 382             | 362             | 487             | 318           | 292           | 0.206572              | 0.105855              | 0.178658            | 0.209442                         | -0.75511                           |
| PHO85     | 186                | 100                | 154                | 171                | 209              | 181              | 249             | 234             | 553             | 408             | 158           | 192           | 0.363494              | 0.256579              | 0.527368            | -0.53688                         | -1.03941                           |
| YHR097C   | 102                | 91                 | 56                 | 156                | 64               | 65               | 314             | 217             | 277             | 385             | 201           | 235           | 0.270323              | 0.228262              | 0.229088            | 0.238784                         | -0.00521                           |
| YSC84     | 157                | 184                | 110                | 249                | 187              | 227              | 587             | 654             | 443             | 723             | 278           | 368           | 0.215296              | 0.227544              | 0.391832            | -0.86391                         | -0.78409                           |
| GCR1      | 2773               | 3145               | 4598               | 6509               | 3655             | 3973             | 0               | 0               | 0               | 0               | 0             | 0             | 1                     | 1                     | 1                   | 0                                | 0                                  |
| YCL012C   | 45                 | 22                 | 34                 | 25                 | 9                | 73               | 612             | 599             | 527             | 561             | 485           | 457           | 0.05196               | 0.051634              | 0.077977            | -0.58565                         | -0.59473                           |
| RPL28     | 74219              | 81440              | 37112              | 60086              | 61627            | 58861            | 64685           | 64190           | 53985           | 76206           | 72229         | 72968         | 0.546772              | 0.424126              | 0.453446            | 0.270007                         | -0.09644                           |
| RPL25     | 7090               | 7022               | 6273               | 8017               | 9714             | 9022             | 16401           | 15748           | 13049           | 16963           | 18551         | 17237         | 0.305103              | 0.322796              | 0.343627            | -0.17155                         | -0.09022                           |
| SPO1      | 447                | 505                | 339                | 469                | 309              | 335              | 25              | 18              | 0               | 37              | 7             | 0             | 0.956309              | 0.963439              | 0.988924            | -0.04838                         | -0.03767                           |
| VMA10     | 371                | 301                | 586                | 706                | 490              | 435              | 850             | 1084            | 1270            | 1364            | 1256          | 841           | 0.260589              | 0.328398              | 0.310775            | -0.2541                          | 0.079573                           |
| VPS29     | 56                 | 123                | 113                | 269                | 131              | 176              | 773             | 855             | 954             | 1673            | 1045          | 1110          | 0.096659              | 0.122211              | 0.124127            | -0.36083                         | -0.02244                           |
| YPR098C   | 100                | 243                | 140                | 247                | 65               | 119              | 1095            | 1209            | 1096            | 1592            | 941           | 926           | 0.125519              | 0.12379               | 0.089244            | 0.492076                         | 0.472073                           |
| MMS2      | 84                 | 74                 | 80                 | 145                | 99               | 69               | 216             | 384             | 980             | 1230            | 564           | 628           | 0.220786              | 0.090463              | 0.124158            | 0.830466                         | -0.45678                           |
| ABP140    | 5                  | 25                 | 3                  | 22                 | 26               | 7                | 542             | 786             | 832             | 1081            | 678           | 764           | 0.019983              | 0.011769              | 0.023005            | -0.20317                         | -0.96696                           |
| YEL076C-A | 603                | 509                | 519                | 747                | 478              | 550              | 0               | 0               | 0               | 0               | 0             | 0             | 1                     | 1                     | 1                   | 0                                | 0                                  |
| YIP3      | 189                | 311                | 230                | 235                | 175              | 208              | 801             | 723             | 748             | 848             | 840           | 760           | 0.245841              | 0.226082              | 0.193645            | 0.344314                         | 0.223431                           |
| YPL109C   | 124                | 245                | 122                | 285                | 123              | 207              | 182             | 245             | 306             | 314             | 268           | 148           | 0.452614              | 0.38042               | 0.448838            | 0.012087                         | -0.2386                            |
| OST5      | 181                | 156                | 207                | 295                | 264              | 261              | 1970            | 1642            | 1908            | 2677            | 2354          | 1990          | 0.085455              | 0.098566              | 0.108394            | -0.34305                         | -0.13713                           |
| RPS0A     | 2248               | 2230               | 1165               | 1730               | 2037             | 1714             | 20993           | 18887           | 17594           | 23039           | 23527         | 20927         | 0.101164              | 0.065974              | 0.077693            | 0.38084                          | -0.23587                           |
| RPS0B     | 3436               | 3944               | 2107               | 2795               | 4120             | 2971             | 28071           | 25287           | 17741           | 25125           | 24649         | 24511         | 0.12199               | 0.103132              | 0.125658            | -0.04274                         | -0.28501                           |
| APS3      | 109                | 142                | 132                | 379                | 174              | 326              | 464             | 425             | 557             | 686             | 408           | 481           | 0.220334              | 0.273725              | 0.351467            | -0.6737                          | -0.36066                           |
| YDR261C-D | 11                 | 42                 | 102                | 187                | 41               | 40               | 44              | 67              | 186             | 198             | 37            | 66            | 0.292661              | 0.41994               | 0.4515              | -0.6255                          | -0.10454                           |
| YJL113W   | 0                  | 1                  | 0                  | 0                  | 0                | 0                | 62              | 28              | 171             | 91              | 61            | 30            | 0.017241              | 0                     | 0 inf               |                                  |                                    |
| NCE101    | 714                | 629                | 689                | 812                | 454              | 391              | 797             | 768             | 1007            | 1386            | 804           | 731           | 0.461393              | 0.387838              | 0.354688            | 0.379446                         | 0.128907                           |
| PCH2      | 1323               | 1359               | 753                | 1127               | 865              | 947              | 10              | 2               | 6               | 24              | 9             | 12            | 0.995514              | 0.985622              | 0.988595            | 0.010063                         | -0.00435                           |
| YPR010C-A | 55                 | 93                 | 105                | 111                | 152              | 77               | 894             | 835             | 595             | 824             | 639           | 461           | 0.079086              | 0.134358              | 0.167642            | -1.0839                          | -0.3193                            |
| RPL34B    | 2486               | 2989               | 1943               | 3279               | 2795             | 2566             | 18937           | 18047           | 20883           | 26308           | 27757         | 22643         | 0.129067              | 0.097974              | 0.096636            | 0.41748                          | 0.019835                           |
| RPL34A    | 3608               | 3709               | 2601               | 3807               | 3104             | 3089             | 33161           | 25903           | 27787           | 30446           | 37319         | 30105         | 0.11169               | 0.098368              | 0.084923            | 0.395261                         | 0.21203                            |
| LSM7      | 149                | 129                | 121                | 329                | 194              | 178              | 719             | 870             | 951             | 1109            | 652           | 823           | 0.150394              | 0.170832              | 0.203568            | -0.43677                         | -0.25294                           |
| RPL43A    | 8885               | 8716               | 5671               | 7026               | 8053             | 7478             | 14611           | 14106           | 10330           | 13222           | 15620         | 12328         | 0.380031              | 0.350706              | 0.358869            | 0.082657                         | -0.0332                            |
| LSM2      | 543                | 584                | 455                | 798                | 564              | 476              | 1625            | 1947            | 1791            | 3046            | 2200          | 2406          | 0.2406                | 0.205089              | 0.184608            | 0.382175                         | 0.15179                            |
| RPL43B    | 3053               | 3135               | 3584               | 4954               | 4634             | 3965             | 2577            | 2367            | 1921            | 2675            | 2807          | 2542          | 0.556033              | 0.650204              | 0.616055            | -0.14789                         | 0.077835                           |
| RPS24B    | 1499               | 1589               | 885                | 1749               | 2196             | 1859             | 4255            | 3174            | 2362            | 3619            | 3516          | 3342          | 0.297064              | 0.299189              | 0.370943            | -0.32042                         | -0.31014                           |

|           | premRNA_<br>fast_A | premRNA_<br>fast_B | premRNA_<br>slow_A | premRNA_<br>slow_B | premRNA_<br>wt_A | premRNA_<br>wt_B | mRNA_<br>fast_A | mRNA_<br>fast_B | mRNA_<br>slow_A | mRNA_<br>slow_B | mRNA_<br>wt_A | mRNA_<br>wt_B | premRNA<br>ratio_fast | premRNA<br>ratio_slow | premRNA<br>ratio_wt | premRNAratio_fast/wt<br>(log2) | premRNAratio_slow/<br>wt(log2) |
|-----------|--------------------|--------------------|--------------------|--------------------|------------------|------------------|-----------------|-----------------|-----------------|-----------------|---------------|---------------|-----------------------|-----------------------|---------------------|--------------------------------|--------------------------------|
| RPS24A    | 6335               | 7118               | 3099               | 4826               | 4982             | 4635             | 10687           | 10767           | 8193            | 10148           | 10496         | 9874          | 0.385076              | 0.298367              | 0.320667            | 0.26407                        | -0.10399                       |
| REC102    | 243                | 443                | 106                | 216                | 230              | 229              | 16              | 0               | 12              | 9               | 19            | 9             | 0.969112              | 0.929153              | 0.94294             | 0.039498                       | -0.02125                       |
| PCC1      | 107                | 105                | 81                 | 245                | 175              | 119              | 1268            | 1133            | 1243            | 1540            | 1077          | 854           | 0.081316              | 0.099217              | 0.131039            | -0.68838                       | -0.40135                       |
| REC107    | 1398               | 1669               | 947                | 1591               | 1331             | 1312             | 118             | 124             | 127             | 124             | 21            | 125           | 0.926503              | 0.904724              | 0.94874             | -0.03422                       | -0.06854                       |
| NYV1      | 132                | 132                | 103                | 227                | 210              | 218              | 551             | 433             | 653             | 610             | 355           | 439           | 0.213447              | 0.203725              | 0.351746            | -0.72066                       | -0.78791                       |
| CGI121    | 321                | 397                | 280                | 493                | 544              | 457              | 374             | 505             | 520             | 765             | 567           | 523           | 0.451002              | 0.370946              | 0.477988            | -0.08384                       | -0.36576                       |
| YMR045C   | 14                 | 17                 | 26                 | 50                 | 13               | 15               | 1253            | 1493            | 3574            | 4335            | 1018          | 1079          | 0.011154              | 0.009312              | 0.01316             | -0.23861                       | -0.49895                       |
| RPL2A     | 924                | 1092               | 394                | 844                | 1357             | 906              | 5394            | 5358            | 5890            | 7737            | 8290          | 6754          | 0.157776              | 0.080528              | 0.129471            | 0.285243                       | -0.68507                       |
| RPL2B     | 6472               | 5942               | 4684               | 7374               | 7938             | 8872             | 3186            | 2880            | 2739            | 3951            | 4998          | 3900          | 0.671831              | 0.641069              | 0.65414             | 0.038497                       | -0.02912                       |
| RIM1      | 462                | 482                | 439                | 727                | 522              | 518              | 3931            | 3459            | 3411            | 4763            | 3230          | 3254          | 0.113736              | 0.123224              | 0.138227            | -0.28135                       | -0.16575                       |
| IST1      | 61                 | 39                 | 33                 | 97                 | 66               | 84               | 194             | 273             | 459             | 569             | 237           | 388           | 0.182108              | 0.106359              | 0.197894            | -0.11993                       | -0.89578                       |
| RPL39     | 2012               | 2755               | 1653               | 2310               | 2128             | 1885             | 4961            | 5006            | 5275            | 7402            | 6875          | 5900          | 0.321761              | 0.238224              | 0.239249            | 0.427476                       | -0.0062                        |
| AIM11     | 126                | 110                | 106                | 123                | 110              | 135              | 449             | 391             | 708             | 754             | 394           | 303           | 0.219346              | 0.135236              | 0.263237            | -0.26315                       | -0.96088                       |
| YBR255C-A | 215                | 146                | 255                | 277                | 269              | 147              | 317             | 237             | 364             | 442             | 312           | 202           | 0.392668              | 0.398606              | 0.442099            | -0.17106                       | -0.14941                       |
| RPL30     | 6540               | 7192               | 5352               | 8270               | 10648            | 9792             | 18610           | 17113           | 11145           | 14212           | 19069         | 14409         | 0.277973              | 0.346136              | 0.381462            | -0.4566                        | -0.1402                        |
| OAZ1      | 6                  | 3                  | 7                  | 1                  | 0                | 5                | 346             | 559             | 292             | 520             | 363           | 350           | 0.011192              | 0.012665              | 0.007042            | 0.668329                       | 0.846781                       |
| UBC4      | 487                | 516                | 781                | 631                | 631              | 836              | 6677            | 6154            | 6756            | 6786            | 6256          | 5168          | 0.07267               | 0.094348              | 0.115431            | -0.6676                        | -0.29096                       |
| EFB1      | 3566               | 4324               | 2957               | 4451               | 3976             | 3729             | 39560           | 42117           | 39259           | 53137           | 53145         | 47410         | 0.087898              | 0.073667              | 0.071263            | 0.302676                       | 0.047879                       |
| SEC27     | 575                | 808                | 511                | 676                | 595              | 565              | 3794            | 4260            | 4128            | 6007            | 4233          | 3812          | 0.14552               | 0.105653              | 0.126162            | 0.205948                       | -0.25594                       |
| RPL33B    | 1088               | 1187               | 804                | 1357               | 1434             | 1140             | 17533           | 16158           | 13490           | 17122           | 24484         | 21241         | 0.063432              | 0.064841              | 0.053132            | 0.255617                       | 0.287321                       |
| PTC7      | 382                | 493                | 387                | 598                | 607              | 424              | 725             | 635             | 760             | 902             | 600           | 448           | 0.391067              | 0.368034              | 0.494569            | -0.33876                       | -0.42633                       |
| RPL33A    | 4693               | 4812               | 3193               | 4110               | 5007             | 4094             | 37134           | 35248           | 29923           | 35680           | 43726         | 35567         | 0.11616               | 0.099855              | 0.102984            | 0.173691                       | -0.04451                       |



|        | premRNA_f<br>ast_A | premRNA_f<br>ast_B | premRNA_<br>slow_A | premRNA_<br>slow_B | premRNA_<br>wt_A | premRNA_<br>wt_B | mRNA_<br>fast_A | mRNA_<br>fast_B | mRNA_<br>slow_A | mRNA_<br>slow_B | mRNA_<br>wt_A | mRNA_<br>wt_B | premRNA<br>ratio_fast | premRNA<br>ratio_slow | premRNA<br>ratio_wt | premRNA<br>ratio_fast/<br>wt(log2) | premRNA<br>ratio_slow/<br>wt(log2) |
|--------|--------------------|--------------------|--------------------|--------------------|------------------|------------------|-----------------|-----------------|-----------------|-----------------|---------------|---------------|-----------------------|-----------------------|---------------------|------------------------------------|------------------------------------|
| RPL13A | 1464               | 1385               | 1182               | 1479               | 1750             | 1545             | 3803            | 4081            | 3445            | 4377            | 4717          | 3886          | 0.265671              | 0.254009              | 0.277541            | -0.06306                           | -0.12782                           |
| RPL13B | 3017               | 3210               | 1613               | 2140               | 2257             | 2107             | 5910            | 6838            | 4582            | 7116            | 8128          | 6312          | 0.328715              | 0.245786              | 0.2338              | 0.491563                           | 0.07213                            |
| RPL14A | 4015               | 4266               | 3099               | 3925               | 4950             | 4539             | 70593           | 66837           | 46404           | 65645           | 70143         | 65670         | 0.056906              | 0.05951               | 0.065284            | -0.19815                           | -0.1336                            |
| RPL14B | 2369               | 2245               | 1641               | 2333               | 2949             | 2462             | 24791           | 23821           | 14367           | 19682           | 18894         | 18656         | 0.086676              | 0.104242              | 0.125796            | -0.53739                           | -0.27115                           |
| RPL16A | 2026               | 2146               | 1419               | 2041               | 2529             | 2198             | 17526           | 16226           | 17937           | 22324           | 24017         | 22443         | 0.110215              | 0.078539              | 0.092235            | 0.256934                           | -0.2319                            |
| RPL16B | 1573               | 1746               | 1120               | 1453               | 1863             | 1484             | 28001           | 27449           | 26926           | 33026           | 36431         | 35372         | 0.056497              | 0.041038              | 0.044457            | 0.345744                           | -0.11546                           |
| RPL17A | 2039               | 2081               | 1257               | 1780               | 2187             | 1937             | 38087           | 34432           | 25028           | 30360           | 32567         | 28388         | 0.053904              | 0.051602              | 0.063401            | -0.23412                           | -0.29708                           |
| RPL17B | 874                | 852                | 885                | 1411               | 1581             | 1687             | 19269           | 19379           | 19905           | 23563           | 23309         | 20512         | 0.042752              | 0.049534              | 0.069757            | -0.70636                           | -0.49393                           |
| RPL18A | 2560               | 2926               | 1466               | 2369               | 2847             | 2976             | 55533           | 55818           | 33450           | 49158           | 53738         | 48442         | 0.046938              | 0.043981              | 0.054096            | -0.20476                           | -0.29864                           |
| RPL18B | 2398               | 2636               | 2222               | 3114               | 3300             | 3152             | 5431            | 5147            | 3943            | 5682            | 6333          | 6272          | 0.322492              | 0.357223              | 0.338519            | -0.06997                           | 0.07759                            |
| RPL19A | 2941               | 3235               | 2065               | 2987               | 3608             | 3476             | 2903            | 2940            | 2668            | 3606            | 3721          | 2728          | 0.513569              | 0.444677              | 0.526287            | -0.03529                           | -0.24309                           |
| RPL19B | 7766               | 7450               | 7081               | 9380               | 9475             | 9517             | 6090            | 5295            | 5504            | 6763            | 6282          | 6120          | 0.572511              | 0.571855              | 0.60497             | -0.07956                           | -0.08121                           |
| RPL20A | 2508               | 3058               | 1629               | 2222               | 2077             | 2650             | 6677            | 7391            | 5268            | 7502            | 8265          | 6804          | 0.282857              | 0.232348              | 0.240568            | 0.233626                           | -0.05016                           |
| RPL20B | 2770               | 3180               | 1395               | 2299               | 2435             | 2448             | 5246            | 5543            | 3568            | 4954            | 5648          | 5055          | 0.355056              | 0.299026              | 0.31376             | 0.178388                           | -0.06939                           |
| RPL21A | 9477               | 9451               | 4750               | 6720               | 7641             | 7104             | 19766           | 19305           | 14565           | 19650           | 22326         | 21020         | 0.32637               | 0.250379              | 0.253788            | 0.362883                           | -0.01951                           |
| RPL21B | 6573               | 6264               | 3360               | 5560               | 6075             | 5277             | 14176           | 12659           | 9617            | 13305           | 14382         | 13667         | 0.323906              | 0.276823              | 0.287761            | 0.170704                           | -0.05591                           |
| RPL22A | 6370               | 7535               | 3731               | 6295               | 6333             | 6789             | 11845           | 12027           | 11417           | 13655           | 17459         | 16174         | 0.367449              | 0.280921              | 0.280916            | 0.387405                           | 2.71E-05                           |
| RPL22B | 11564              | 13487              | 7976               | 12443              | 13820            | 12781            | 384             | 309             | 532             | 649             | 697           | 683           | 0.972731              | 0.943949              | 0.95063             | 0.033158                           | -0.01017                           |
| RPL23A | 2696               | 2928               | 2252               | 2403               | 2900             | 2658             | 24928           | 26625           | 23757           | 33011           | 29283         | 28051         | 0.098336              | 0.07722               | 0.088332            | 0.154786                           | -0.19396                           |
| RPL23B | 6219               | 6117               | 3896               | 5868               | 6985             | 6069             | 38703           | 35364           | 33114           | 42844           | 49086         | 40374         | 0.142953              | 0.112866              | 0.127625            | 0.163622                           | -0.1773                            |
| RPL25  | 7090               | 7022               | 6273               | 8017               | 9714             | 9022             | 16401           | 15748           | 13049           | 16963           | 18551         | 17237         | 0.305103              | 0.322796              | 0.343627            | -0.17155                           | -0.09022                           |
| RPL26A | 2567               | 2830               | 1823               | 2712               | 3471             | 2603             | 16077           | 15053           | 15999           | 21242           | 23946         | 20881         | 0.147968              | 0.107753              | 0.118721            | 0.317711                           | -0.13984                           |
| RPL26B | 2837               | 3932               | 2543               | 3538               | 2349             | 2725             | 32691           | 32373           | 29412           | 38293           | 41235         | 40092         | 0.094079              | 0.08208               | 0.058769            | 0.6788                             | 0.481957                           |
| RPL27A | 3333               | 3037               | 2196               | 3149               | 2675             | 2548             | 32790           | 33478           | 24217           | 31250           | 34002         | 34096         | 0.08772               | 0.087342              | 0.071234            | 0.300336                           | 0.294113                           |
| RPL27B | 2098               | 2648               | 1497               | 2016               | 2164             | 2386             | 8300            | 8720            | 7633            | 10549           | 10009         | 10097         | 0.217352              | 0.162205              | 0.184455            | 0.236763                           | -0.18545                           |
| RPL28  | 74219              | 81440              | 37112              | 60086              | 61627            | 58861            | 64685           | 64190           | 53985           | 76206           | 72229         | 72968         | 0.546772              | 0.424126              | 0.453446            | 0.270007                           | -0.09644                           |
| RPL2A  | 924                | 1092               | 394                | 844                | 1357             | 906              | 5394            | 5358            | 5890            | 7737            | 8290          | 6754          | 0.157776              | 0.080528              | 0.129471            | 0.285243                           | -0.68507                           |
| RPL2B  | 6472               | 5942               | 4684               | 7374               | 7938             | 8872             | 3186            | 2880            | 2739            | 3951            | 4998          | 3900          | 0.671831              | 0.641069              | 0.65414             | 0.038497                           | -0.02912                           |
| RPL30  | 6540               | 7192               | 5352               | 8270               | 10648            | 9792             | 18610           | 17113           | 11145           | 14212           | 19069         | 14409         | 0.277973              | 0.346136              | 0.381462            | -0.4566                            | -0.1402                            |
| RPL31A | 2001               | 2007               | 1469               | 2027               | 1901             | 1935             | 61377           | 58478           | 41713           | 51267           | 58439         | 50652         | 0.032377              | 0.036027              | 0.03415             | -0.07693                           | 0.077154                           |
| RPL31B | 947                | 1042               | 993                | 1240               | 1704             | 1264             | 9305            | 9366            | 11632           | 15559           | 13204         | 13276         | 0.096244              | 0.076234              | 0.100617            | -0.06411                           | -0.40037                           |
| RPL33A | 4693               | 4812               | 3193               | 4110               | 5007             | 4094             | 37134           | 35248           | 29923           | 35680           | 43726         | 35567         | 0.11616               | 0.099855              | 0.102984            | 0.173691                           | -0.04451                           |
| RPL33B | 1088               | 1187               | 804                | 1357               | 1434             | 1140             | 17533           | 16158           | 13490           | 17122           | 24484         | 21241         | 0.063432              | 0.064841              | 0.053132            | 0.255617                           | 0.287321                           |
| RPL34A | 3608               | 3709               | 2601               | 3807               | 3104             | 3089             | 33161           | 25903           | 27787           | 30446           | 37319         | 30105         | 0.11169               | 0.098368              | 0.084923            | 0.395261                           | 0.21203                            |
| RPL34B | 2486               | 2989               | 1943               | 3279               | 2795             | 2566             | 18937           | 18047           | 20883           | 26308           | 27757         | 22643         | 0.129067              | 0.097974              | 0.096636            | 0.41748                            | 0.019835                           |
| RPL35A | 3773               | 3798               | 3452               | 4739               | 4943             | 4026             | 6139            | 5734            | 6292            | 7094            | 8010          | 6430          | 0.389549              | 0.37738               | 0.383326            | 0.02323                            | -0.02256                           |
| RPL35B | 3061               | 3662               | 2386               | 3629               | 3131             | 2753             | 7343            | 7159            | 5349            | 6672            | 7275          | 7138          | 0.316315              | 0.330382              | 0.289609            | 0.127255                           | 0.190029                           |
| RPL36A | 3231               | 4022               | 2693               | 3789               | 3071             | 3282             | 8508            | 8131            | 9153            | 12329           | 10654         | 10768         | 0.303092              | 0.231206              | 0.228673            | 0.406467                           | 0.015894                           |
| RPL36B | 1373               | 1313               | 894                | 961                | 1365             | 1132             | 34145           | 31134           | 29370           | 36932           | 43261         | 35144         | 0.039561              | 0.02745               | 0.030896            | 0.356649                           | -0.17061                           |
| RPL37A | 3353               | 3119               | 2428               | 3464               | 3589             | 3342             | 7605            | 7058            | 6854            | 7806            | 8238          | 7791          | 0.306231              | 0.284473              | 0.301823            | 0.020915                           | -0.08541                           |
| RPL37B | 2912               | 3477               | 1721               | 2196               | 1860             | 1567             | 13952           | 11459           | 8860            | 10506           | 11712         | 9786          | 0.202734              | 0.167768              | 0.137536            | 0.559781                           | 0.286659                           |

|               | premRNA_f<br>ast_A | premRNA_f<br>ast_B | premRNA_<br>slow_A | premRNA_<br>slow_B | premRNA_<br>wt_A | premRNA_<br>wt_B | mRNA_<br>fast_A | mRNA_<br>fast_B | mRNA_<br>slow_A | mRNA_<br>slow_B | mRNA_<br>wt_A | mRNA_<br>wt_B | premRNA<br>ratio_fast | premRNA<br>ratio_slow | premRNA<br>ratio_wt | premRNA<br>ratio_fast/<br>wt(log2) | premRNA<br>ratio_slow/<br>wt(log2) |
|---------------|--------------------|--------------------|--------------------|--------------------|------------------|------------------|-----------------|-----------------|-----------------|-----------------|---------------|---------------|-----------------------|-----------------------|---------------------|------------------------------------|------------------------------------|
| RPL39         | 2012               | 2755               | 1653               | 2310               | 2128             | 1885             | 4961            | 5006            | 5275            | 7402            | 6875          | 5900          | 0.321761              | 0.238224              | 0.239249            | 0.427476                           | -0.0062                            |
| <b>RPL40A</b> | 11578              | 11571              | 9516               | 12981              | 15202            | 11219            | 12834           | 13138           | 13110           | 17679           | 19349         | 15927         | 0.471283              | 0.421982              | 0.426635            | 0.143589                           | -0.01582                           |
| RPL40B        | 1335               | 1314               | 810                | 1473               | 1725             | 1690             | 16250           | 16269           | 15322           | 19020           | 22130         | 19643         | 0.075324              | 0.061044              | 0.075766            | -0.00844                           | -0.31169                           |
| RPL42A        | 11151              | 11837              | 12080              | 16110              | 16205            | 16179            | 5470            | 4413            | 4676            | 5711            | 6610          | 5455          | 0.699665              | 0.729608              | 0.729064            | -0.05938                           | 0.001075                           |
| RPL42B        | 2253               | 2601               | 1548               | 2454               | 2372             | 2549             | 14555           | 13001           | 8923            | 11540           | 16536         | 15128         | 0.150376              | 0.161599              | 0.134824            | 0.157499                           | 0.261339                           |
| <b>RPL43A</b> | <b>8885</b>        | 8716               | 5671               | 7026               | 8053             | 7478             | 14611           | 14106           | 10330           | 13222           | 15620         | 12328         | 0.380031              | 0.350706              | 0.358869            | 0.082657                           | -0.0332                            |
| <b>RPL43B</b> | 3053               | 3135               | 3584               | 4954               | 4634             | 3965             | 2577            | 2367            | 1921            | 2675            | 2807          | 2542          | 0.556033              | 0.650204              | 0.616055            | -0.14789                           | 0.077835                           |
| RPL6A         | 1869               | 1736               | 941                | 1284               | 1294             | 1219             | 10228           | 9716            | 8809            | 12512           | 13318         | 11724         | 0.153045              | 0.094792              | 0.09137             | 0.744169                           | 0.053043                           |
| RPL6B         | 1880               | 2029               | 1415               | 1676               | 2143             | 1619             | 18820           | 19719           | 15785           | 20311           | 26280         | 21313         | 0.092059              | 0.079247              | 0.072998            | 0.334688                           | 0.118495                           |
| RPO26         | 388                | 518                | 656                | 800                | 774              | 761              | 1785            | 1731            | 2349            | 2777            | 2945          | 2348          | 0.20444               | 0.220977              | 0.226447            | -0.1475                            | -0.03528                           |
| RPP1B         | 3459               | 3348               | 2721               | 4154               | 4685             | 5164             | 61825           | 60268           | 45962           | 65371           | 62118         | 59455         | 0.052806              | 0.05782               | 0.075023            | -0.50663                           | -0.37576                           |
| RPS0A         | 2248               | 2230               | 1165               | 1730               | 2037             | 1714             | 20993           | 18887           | 17594           | 23039           | 23527         | 20927         | 0.101164              | 0.065974              | 0.077693            | 0.38084                            | -0.23587                           |
| RPS0B         | 3436               | 3944               | 2107               | 2795               | 4120             | 2971             | 28071           | 25287           | 17741           | 25125           | 24649         | 24511         | 0.12199               | 0.103132              | 0.125658            | -0.04274                           | -0.28501                           |
| RPS10A        | 2958               | 3108               | 2017               | 3432               | 3742             | 3886             | 39842           | 37670           | 35960           | 43875           | 45573         | 40250         | 0.072665              | 0.062829              | 0.081963            | -0.17371                           | -0.38353                           |
| RPS10B        | 2235               | 2413               | 1848               | 2647               | 2051             | 2076             | 30938           | 27425           | 24684           | 28147           | 24466         | 21717         | 0.074122              | 0.077805              | 0.0823              | -0.15098                           | -0.08102                           |
| <b>RPS11A</b> | 2284               | 2349               | 1378               | 2189               | 2451             | 2033             | 44844           | 40867           | 41816           | 49592           | 60786         | 47667         | 0.051409              | 0.037088              | 0.039832            | 0.368095                           | -0.10297                           |
| <b>RPS11B</b> | 2947               | 3426               | 1945               | 2912               | 3469             | 2996             | 23216           | 21589           | 19059           | 23283           | 29458         | 25085         | 0.124799              | 0.101884              | 0.106023            | 0.235231                           | -0.05745                           |
| RPS13         | 32757              | 33391              | 13861              | 20174              | 25585            | 21921            | 12713           | 12960           | 10449           | 14866           | 17348         | 14839         | 0.720402              | 0.572959              | 0.596128            | 0.273179                           | -0.05719                           |
| RPS14A        | 5304               | 6061               | 1692               | 2339               | 2619             | 2663             | 31736           | 26432           | 22857           | 27777           | 29542         | 27726         | 0.164865              | 0.073295              | 0.084532            | 0.963708                           | -0.20579                           |
| <b>RPS14B</b> | 3614               | 3997               | 2598               | 3947               | 6078             | 5713             | 3418            | 2511            | 1744            | 1988            | 4471          | 3473          | 0.564052              | 0.63169               | 0.599047            | -0.08684                           | 0.076548                           |
| RPS16A        | 2909               | 3290               | 2137               | 3259               | 2995             | 3108             | 9436            | 10175           | 9242            | 13327           | 13092         | 12440         | 0.23999               | 0.192147              | 0.193036            | 0.314101                           | -0.00666                           |
| RPS16B        | 2875               | 2873               | 1517               | 2319               | 2851             | 2554             | 24775           | 24828           | 18867           | 24463           | 29972         | 26523         | 0.103846              | 0.080505              | 0.087348            | 0.249609                           | -0.1177                            |
| RPS17A        | 8545               | 7274               | 6069               | 7438               | 9703             | 8882             | 17861           | 17134           | 15351           | 20995           | 26661         | 21157         | 0.310809              | 0.272465              | 0.281256            | 0.144144                           | -0.04581                           |
| <b>RPS17B</b> | 2307               | 2659               | 1159               | 1809               | 2513             | 2020             | 4141            | 4492            | 4621            | 5765            | 5737          | 4407          | 0.364811              | 0.219681              | 0.309453            | 0.23743                            | -0.49431                           |
| RPS18A        | 2935               | 2986               | 2103               | 3215               | 3425             | 3251             | 29420           | 29306           | 23611           | 33687           | 30949         | 33262         | 0.091591              | 0.084453              | 0.094338            | -0.04264                           | -0.15968                           |
| RPS18B        | 1113               | 1204               | 971                | 1151               | 1045             | 1252             | 23529           | 24150           | 21514           | 31723           | 30896         | 32434         | 0.046327              | 0.039098              | 0.034942            | 0.40691                            | 0.162161                           |
| <b>RPS19A</b> | 2397               | 2393               | 1629               | 2372               | 2452             | 2225             | 16794           | 16373           | 13905           | 17881           | 15652         | 15929         | 0.12621               | 0.110993              | 0.129001            | -0.03156                           | -0.21692                           |
| <b>RPS19B</b> | 2845               | 2911               | 1683               | 2603               | 2719             | 2406             | 25124           | 25245           | 22186           | 28165           | 27950         | 25344         | 0.102554              | 0.077555              | 0.08768             | 0.226072                           | -0.17701                           |
| RPS21A        | 2681               | 2194               | 1338               | 2088               | 2601             | 2657             | 31967           | 32994           | 19657           | 27747           | 29812         | 27827         | 0.069865              | 0.066857              | 0.083703            | -0.26072                           | -0.3242                            |
| <b>RPS21B</b> | 886                | 935                | 744                | 1058               | 1233             | 1217             | 28754           | 29480           | 20819           | 30790           | 31625         | 28061         | 0.030317              | 0.033862              | 0.039546            | -0.38342                           | -0.22387                           |
| RPS22B        | 4582               | 4571               | 2017               | 3779               | 5328             | 5360             | 14320           | 13836           | 8298            | 9625            | 11326         | 9231          | 0.245369              | 0.238736              | 0.343636            | -0.48593                           | -0.52547                           |
| RPS23A        | 2079               | 2254               | 1471               | 2387               | 2630             | 2454             | 23914           | 21271           | 18446           | 26058           | 23788         | 21631         | 0.087898              | 0.078886              | 0.100721            | -0.19647                           | -0.35252                           |
| RPS23B        | 2643               | 2903               | 1728               | 2786               | 2817             | 2721             | 47937           | 48544           | 34209           | 46954           | 46921         | 45832         | 0.05434               | 0.052048              | 0.056339            | -0.05212                           | -0.11431                           |
| RPS24A        | 6335               | 7118               | 3099               | 4826               | 4982             | 4635             | 10687           | 10767           | 8193            | 10148           | 10496         | 9874          | 0.385076              | 0.298367              | 0.320667            | 0.26407                            | -0.10399                           |
| RPS24B        | 1499               | 1589               | 885                | 1749               | 2196             | 1859             | 4255            | 3174            | 2362            | 3619            | 3516          | 3342          | 0.297064              | 0.299189              | 0.370943            | -0.32042                           | -0.31014                           |
| RPS27A        | 3377               | 4145               | 2529               | 3496               | 4226             | 3003             | 1673            | 1383            | 1033            | 1231            | 1554          | 1447          | 0.709266              | 0.724788              | 0.702987            | 0.012829                           | 0.044061                           |
| RPS27B        | 1964               | 2719               | 1359               | 2193               | 2391             | 1937             | 16178           | 15957           | 15716           | 23960           | 24736         | 24605         | 0.126923              | 0.081721              | 0.08056             | 0.655815                           | 0.020653                           |
| <b>RPS30A</b> | 3479               | 4608               | 1919               | 3777               | 2680             | 2778             | 23433           | 22750           | 17665           | 21855           | 21698         | 15351         | 0.148853              | 0.122672              | 0.131585            | 0.177894                           | -0.1012                            |
| <b>RPS30B</b> | 1416               | 1744               | 1087               | 2059               | 1452             | 1471             | 7751            | 7140            | 5288            | 8186            | 8001          | 7222          | 0.175388              | 0.185743              | 0.161409            | 0.119822                           | 0.202584                           |
| RPS4A         | 1222               | 1514               | 825                | 1253               | 1516             | 1494             | 24674           | 22558           | 21900           | 26360           | 29382         | 23970         | 0.055042              | 0.04084               | 0.053868            | 0.0311                             | -0.39943                           |
| RPS4B         | 1363               | 1384               | 561                | 1058               | 1308             | 996              | 13148           | 13605           | 8297            | 13005           | 12833         | 11929         | 0.093132              | 0.069283              | 0.084778            | 0.135572                           | -0.2912                            |

|       | premRNA_f<br>ast_A | premRNA_f<br>ast_B | premRNA_<br>slow_A | premRNA_<br>slow_B | premRNA_<br>wt_A | premRNA_<br>wt_B | mRNA_<br>fast_A | mRNA_<br>fast_B | mRNA_<br>slow_A | mRNA_<br>slow_B | mRNA_<br>wt_A | mRNA_<br>wt_B | premRNA<br>ratio_fast | premRNA<br>ratio_slow | premRNA<br>ratio_wt | premRNA<br>ratio_fast/<br>wt(log2) | premRNA<br>ratio_slow/<br>wt(log2) |
|-------|--------------------|--------------------|--------------------|--------------------|------------------|------------------|-----------------|-----------------|-----------------|-----------------|---------------|---------------|-----------------------|-----------------------|---------------------|------------------------------------|------------------------------------|
| RPS6A | 1627               | 1788               | 1264               | 2138               | 1999             | 1861             | 6254            | 6308            | 6391            | 9254            | 8148          | 8710          | 0.213648              | 0.176398              | 0.186526            | 0.195859                           | -0.08054                           |
| RPS6B | 4319               | 4714               | 2009               | 3067               | 3773             | 3055             | 13989           | 16458           | 11840           | 18193           | 17903         | 16307         | 0.22928               | 0.144663              | 0.165923            | 0.466594                           | -0.19782                           |
| RPS7A | 3545               | 3785               | 2635               | 3514               | 3450             | 3321             | 77457           | 76820           | 48960           | 68065           | 74992         | 65096         | 0.045361              | 0.050082              | 0.046261            | -0.02835                           | 0.114486                           |
| RPS7B | 2022               | 1952               | 1568               | 2366               | 3173             | 2610             | 27095           | 23675           | 21254           | 22776           | 30048         | 24798         | 0.072807              | 0.081406              | 0.09537             | -0.38946                           | -0.2284                            |
| RPS9A | 4568               | 4763               | 3262               | 4822               | 5716             | 6217             | 212             | 219             | 839             | 975             | 996           | 849           | 0.955845              | 0.813613              | 0.865728            | 0.142863                           | -0.08957                           |
| RPS9B | 8394               | 9030               | 4237               | 5585               | 9919             | 8361             | 25405           | 24513           | 18985           | 22399           | 27688         | 24705         | 0.258779              | 0.191017              | 0.258306            | 0.002637                           | -0.43538                           |

**Table S2. Genes with non-canonical 5' splice sites and their splicing efficiency**

Of 24 RPs (including YML6\*, a mitochondrial RP) with non-canonical 5'SS, 19 splice worse (red) and 5 splice better (green) with fast RNAPII

Of 12 non-RPs with the same non-canonical 5'SS, 4 splice worse and 8 splice better with fast RNAPII The non-RPs are colour coded in the 1<sup>st</sup> column. The RPs are colour coded in the 2<sup>nd</sup> column. Non-consensus Branch Point sequences are also colored red. **5'SS GTACGT**: 19 introns: (including

**14 RPs**, plus YML6\*, a mitochondrial RP)

| ORF       | Aliases | position              | 5' SS  | Branch Point           | 3' SS  |
|-----------|---------|-----------------------|--------|------------------------|--------|
| YBR189W   | RPS9B   | chrII:604509-604932   | GTACGT | T <b>GACTAACA</b> AAGA | TTTTAG |
| YDL012C   |         | chrIV:431467-431391   | GTACGT | GTACTAACGAGC           | ATTCAG |
| YDR447C   | RPS17B  | chrIV:1355545-1355241 | GTACGT | TTACTAACTTAA           | TTATAG |
| YDR471W   | RPL27B  | chrIV:1401795-1402189 | GTACGT | TTACTAACAAAT           | TCGTAG |
| YFL034C-A | RPL22B  | chrVI:64915-64604     | GTACGT | TTACTAACATAA           | TAACAG |
| YGL226C-A | OST5    | chrVII:73132-72993    | GTACGT | TTACTAACAAGT           | CTTAAG |
| YHR010W   | RPL27A  | chrVIII:126546-127117 | GTACGT | TTACTAACTATT           | ACACAG |
| YIL133C   | RPL16A  | chrIX:99380-99100     | GTACGT | ATACTAACAAAT           | AACCAG |
| YJL136C   | RPS21B  | chrX:157244-156794    | GTACGT | GTACTAACATTG           | TACTAG |
| YJL191W   | RPS14B  | chrX:73791-74209      | GTACGT | TTACTAACAAC            | GTATAG |
| YLR287C-A | RPS30A  | chrXII:713150-712730  | GTACGT | ATACTAACATGG           | ATTTAG |
| YLR306W   | UBC12   | chrXII:744148-744292  | GTACGT | ATACTAACATAA           | AAATAG |
| YML025C   | YML6*   | chrXIII:225333-225244 | GTACGT | ATACTAACATTA           | CAATAG |
| YMR033W   | ARP9    | chrXIII:337812-337908 | GTACGT | ATACTAACAACA           | TAACAG |
| YNL069C   | RPL16B  | chrXIV:494968-494529  | GTACGT | TTACTAACTTTA           | TTATAG |
| YNL302C   | RPS19B  | chrXIV:62918-62377    | GTACGT | TTACTAACAAAA           | AATTAG |
| YOL121C   | RPS19A  | chrXV:92825-92445     | GTACGT | TTACTAACAATA           | CTACAG |
| YOR182C   | RPS30B  | chrXV:678785-678384   | GTACGT | TTACTAACATTA           | CCTTAG |
| YPL081W   | RPS9A   | chrXVI:404951-405462  | GTACGT | T <b>CACTAACA</b> ATG  | AAACAG |

**5'SS GTATGC**: 8 introns, including **2 RPs**

| ORF       | Aliases   | position              | 5' SS  | Branch Point          | 3' SS  |
|-----------|-----------|-----------------------|--------|-----------------------|--------|
| YBL059W   |           | chrII:110874-110953   | GTATCG | TTACTAACATAA          | ACATAG |
| YCL002C   |           | chrIII:111628-111562  | GTATGC | TT <b>GACTAAC</b> TAA | ACATAG |
| YDR305C   | HNT2      | chrIV:1073396-1073317 | GTATGC | TTACTAACTATA          | TTACAG |
| YEL003W   | GIM4 PFD2 | chrV:148189-148287    | GTATGC | CTTACTAACAAT          | GTATAG |
| YIL148W   | RPL40A    | chrIX:68710-69154     | GTATGC | TTACTAACTTGT          | TAACAG |
| YJR094W-A | RPL43B    | chrX:608301-608586    | GTATGC | TTACTAACAAAT          | TTGCAG |
| YLL050C   | COF1      | chrXII:40395-40226    | GTATGC | TTACTAACTAAT          | GTGTAG |
| YNL050C   | YNL050C   | chrXIV:534960-534879  | GTATGC | TTACTAACTTTT          | TTGCAG |

**5'SS GTATGA: 6 introns in our data (5 RPs)**

| ORF     | Aliases | position             | 5' SS  | Branch Point | 3' SS  |
|---------|---------|----------------------|--------|--------------|--------|
| YBR048W | RPS11B  | chrII:332870-333391  | GTATGA | TTACTAACATGC | ATACAG |
| YDR025W | RPS11A  | chrIV:491554-491903  | GTATGA | TTACTAACCTTT | TTTTAG |
| YIL004C | BET1    | chrIX:348489-348368  | GTATGA | TTACTAACTATA | ATATAG |
| YLR061W | RPL22A  | chrXII:263200-263599 | GTATGA | TTACTAACATTA | ATATAG |
| YPL090C | RPS6A   | chrXVI:378384-378000 | GTATGA | ATACTAACAAAT | AAATAG |
| YPR043W | RPL43A  | chrXVI:654162-654575 | GTATGA | TTACTAACATAT | ATACAG |

**5'SS GTCNNN: 1 RP**

| ORF     | Aliases | position             | 5' SS  | Branch Point  | 3' SS  |
|---------|---------|----------------------|--------|---------------|--------|
| YGL030W | RPL30   | chrVII:439088-439328 | GTCAGT | CTACTAACCAAGT | CAACAG |

**5'SS GTGNNN: 2 introns, including 1 RPG**

| ORF     | Aliases | position              | 5' SS  | Branch Point | 3' SS  |
|---------|---------|-----------------------|--------|--------------|--------|
| YML034W | SRC1    | chrXIII:211439-211575 | GTGAGT | TTACTAACATCT | CTCTAG |
| YMR242C | RPL20A  | chrXIII:754214-753747 | GTGAGT | CATACTAACATT | TATCAG |

**The following non-canonical 5'SS are not found in RPs****5'SS GTAGTA: 1 intron – no RPs**

| ORF     | Aliases | position             | 5' SS  | Branch Point | 3' SS  |
|---------|---------|----------------------|--------|--------------|--------|
| YCL012C |         | chrIII:101695-101638 | GTAGTA | ATACTAACAGCT | TAATAG |

**5'SS GTAANN: 11 introns – no RPs. N.B. GTAAGT stabilises interaction with U1 snRNA**

Of 11 for which we have data (but low counts, so not all reliable), 3 splice worse and 8 splice better with fast RNAPII. Some also have non-consensus BP sequences (red)

| ORF       | Aliases   | position               | 5' SS  | Branch Point          | 3' SS  |
|-----------|-----------|------------------------|--------|-----------------------|--------|
| YAL030W   | SNC1      | chrI:87382-87505       | GTAAGT | ATACTAACTTTC          | TTTTAG |
| YBL059C-A |           | chrII:110500-110425    | GTAAGT | TTACTAACATTG          | TTTTAG |
| YDL064W   | UBC9      | chrIV:337519-337639    | GTAAGT | ATACTAACAAAT          | TAACAG |
| YFR045W   |           | chrVI:242004-242086    | GTAAGT | TT <b>TATTA</b> ACGCT | TTGCAG |
| YHR001W-A | QCR10     | chrVIII:107826-107899  | GTAAGT | ATACTAACATTT          | ATACAG |
| YIL156W-A | YIL156W-B | chrIX:47693-47765      | GTAAGT | AATACTAACAAAG         | GGTTAG |
| YKR095W-A | PCC1      | chrXI:625896-625981    | GTAAGT | TTACTAACTATT          | CATTAG |
| YLR211C   |           | chrXII:564508-564459   | GTAAGT | <b>TGACTAAC</b> ATGA  | AATTAG |
| YLR445W   |           | chrXII:1024567-1024659 | GTAAGT | TT <b>TACTA</b> ATAAT | TAACAG |
| YNL012W   | SPO1      | chrXIV:609785-609879   | GTAAGT | <b>AAACTAAC</b> CGAA  | TATTAG |
| YNL044W   | YIP3      | chrXIV:545286-545375   | GTAAGT | ATACTAACGCGT          | CTATAG |
